# Supplementary material for: Carnivore coexistence without competition: giant otters are more nocturnal around dens than sympatric neotropical otters
Source: PeerJ. 2024 Apr 5;12:e17244. doi: 10.7717/peerj.17244 (PMC11000638; doi:10.7717/peerj.17244)
Supplement: Supplemental Information 2 — The “entrance_times” includes the raw data used to generate Figure 2. [file peerj-12-17244-s002.xlsx]

## Sheet: readme
Sheet "entrance_times" includes raw data used to generate Figure 2 in:
Carnivore coexistence without competition: Giant otters are more nocturnal around dens than sympatric neotropical otters
column name	Description
DateTime	date and time of photos
species	Species photographed
den_id	den identification code
entrance_activity	activity

## Sheet: entrance_times
DateTime	species	den_id	entrance_activity
2021-08-14 08:48:39	Pteronura brasiliensis	D1	getting out
2021-08-14 08:48:39	Pteronura brasiliensis	D1	getting out
2021-08-19 16:04:05	Pteronura brasiliensis	D1	getting in
2021-08-19 16:04:05	Pteronura brasiliensis	D1	getting in
2021-08-19 16:04:06	Pteronura brasiliensis	D1	getting in
2021-08-19 16:04:48	Pteronura brasiliensis	D1	getting in and out
2021-08-19 16:05:01	Pteronura brasiliensis	D1	in front
2021-08-19 16:05:02	Pteronura brasiliensis	D1	in front
2021-08-19 16:05:02	Pteronura brasiliensis	D1	in front
2021-08-19 16:05:44	Pteronura brasiliensis	D1	getting in and out
2021-08-19 16:06:06	Pteronura brasiliensis	D1	getting out
2021-08-19 16:06:07	Pteronura brasiliensis	D1	getting out
2021-08-19 16:06:07	Pteronura brasiliensis	D1	getting out
2021-08-19 16:06:50	Pteronura brasiliensis	D1	getting in and out
2021-08-19 16:07:44	Pteronura brasiliensis	D1	getting in
2021-08-19 16:08:36	Pteronura brasiliensis	D1	getting out
2021-08-19 16:08:50	Pteronura brasiliensis	D1	getting in
2021-08-19 16:08:50	Pteronura brasiliensis	D1	getting in
2021-08-19 16:08:51	Pteronura brasiliensis	D1	getting in
2021-08-19 16:09:34	Pteronura brasiliensis	D1	getting in and out
2021-08-19 16:09:42	Pteronura brasiliensis	D1	getting in
2021-08-19 16:09:43	Pteronura brasiliensis	D1	getting in
2021-08-19 16:09:43	Pteronura brasiliensis	D1	getting in
2021-08-19 16:10:26	Pteronura brasiliensis	D1	getting in and out
2021-08-19 16:10:31	Pteronura brasiliensis	D1	getting out
2021-08-19 16:10:32	Pteronura brasiliensis	D1	getting out
2021-08-19 16:10:32	Pteronura brasiliensis	D1	getting out
2021-08-19 18:14:04	Pteronura brasiliensis	D1	getting in
2021-08-19 18:14:05	Pteronura brasiliensis	D1	getting in
2021-08-19 18:14:05	Pteronura brasiliensis	D1	getting in
2021-08-19 18:14:48	Pteronura brasiliensis	D1	getting in and out
2021-08-19 18:14:59	Pteronura brasiliensis	D1	getting out
2021-08-19 18:15:00	Pteronura brasiliensis	D1	getting out
2021-08-19 18:15:00	Pteronura brasiliensis	D1	getting out
2021-08-19 18:15:42	Pteronura brasiliensis	D1	getting in
2021-08-19 18:15:58	Pteronura brasiliensis	D1	getting out
2021-08-19 18:15:59	Pteronura brasiliensis	D1	getting out
2021-08-19 18:15:59	Pteronura brasiliensis	D1	getting out
2021-08-19 18:18:21	Pteronura brasiliensis	D1	getting in
2021-08-19 18:18:21	Pteronura brasiliensis	D1	getting in
2021-08-19 18:18:21	Pteronura brasiliensis	D1	getting in
2021-08-19 18:19:02	Pteronura brasiliensis	D1	getting in
2021-08-19 18:19:29	Pteronura brasiliensis	D1	getting out
2021-08-19 18:19:30	Pteronura brasiliensis	D1	getting out
2021-08-19 18:19:30	Pteronura brasiliensis	D1	getting out
2021-08-19 18:20:12	Pteronura brasiliensis	D1	getting out
2021-08-20 13:44:18	Pteronura brasiliensis	D1	in front
2021-08-20 13:44:18	Pteronura brasiliensis	D1	in front
2021-08-20 13:44:19	Pteronura brasiliensis	D1	in front
2021-08-20 13:45:02	Pteronura brasiliensis	D1	getting out
2021-08-21 14:28:22	Pteronura brasiliensis	D1	getting in
2021-08-21 14:28:22	Pteronura brasiliensis	D1	getting in
2021-08-21 14:28:23	Pteronura brasiliensis	D1	getting in
2021-08-21 14:29:06	Pteronura brasiliensis	D1	getting in
2021-08-21 14:29:43	Pteronura brasiliensis	D1	getting out
2021-08-21 14:29:43	Pteronura brasiliensis	D1	getting out
2021-08-21 14:29:44	Pteronura brasiliensis	D1	getting out
2021-08-21 14:30:24	Pteronura brasiliensis	D1	getting out
2021-08-25 14:40:51	Pteronura brasiliensis	D1	getting in
2021-08-25 14:40:52	Pteronura brasiliensis	D1	getting in
2021-08-25 14:40:52	Pteronura brasiliensis	D1	getting in
2021-08-25 14:41:34	Pteronura brasiliensis	D1	getting in
2021-08-25 14:42:00	Pteronura brasiliensis	D1	getting out
2021-08-25 14:42:01	Pteronura brasiliensis	D1	getting out
2021-08-25 14:42:01	Pteronura brasiliensis	D1	getting out
2021-08-25 14:42:44	Pteronura brasiliensis	D1	getting in
2021-08-25 14:42:52	Pteronura brasiliensis	D1	getting out
2021-08-25 14:42:53	Pteronura brasiliensis	D1	getting out
2021-08-25 14:42:53	Pteronura brasiliensis	D1	getting out
2021-08-25 14:43:36	Pteronura brasiliensis	D1	getting in and out
2021-08-25 14:45:13	Pteronura brasiliensis	D1	getting out
2021-08-25 14:45:14	Pteronura brasiliensis	D1	getting out
2021-08-25 14:45:14	Pteronura brasiliensis	D1	getting out
2021-08-25 14:45:56	Pteronura brasiliensis	D1	getting in
2021-08-25 14:46:11	Pteronura brasiliensis	D1	getting in
2021-08-25 14:46:12	Pteronura brasiliensis	D1	getting in
2021-08-25 14:46:12	Pteronura brasiliensis	D1	getting in
2021-08-25 14:46:54	Pteronura brasiliensis	D1	getting in
2021-08-25 14:47:26	Pteronura brasiliensis	D1	getting out
2021-08-25 14:47:27	Pteronura brasiliensis	D1	getting out
2021-08-25 14:47:27	Pteronura brasiliensis	D1	getting out
2021-08-25 14:48:10	Pteronura brasiliensis	D1	getting out
2021-08-25 14:48:29	Pteronura brasiliensis	D1	getting in
2021-08-25 14:48:30	Pteronura brasiliensis	D1	getting in
2021-08-25 14:48:30	Pteronura brasiliensis	D1	getting in
2021-08-25 14:49:12	Pteronura brasiliensis	D1	getting in
2021-08-25 14:49:26	Pteronura brasiliensis	D1	getting out
2021-08-25 14:49:26	Pteronura brasiliensis	D1	getting out
2021-08-25 14:49:26	Pteronura brasiliensis	D1	getting out
2021-08-25 14:50:08	Pteronura brasiliensis	D1	getting in
2021-08-25 14:51:17	Pteronura brasiliensis	D1	getting out
2021-08-25 14:51:18	Pteronura brasiliensis	D1	getting out
2021-08-25 14:51:18	Pteronura brasiliensis	D1	getting out
2021-08-25 17:56:45	Pteronura brasiliensis	D1	getting in
2021-08-25 17:56:45	Pteronura brasiliensis	D1	getting in
2021-08-25 17:56:45	Pteronura brasiliensis	D1	getting in
2021-08-25 17:57:26	Pteronura brasiliensis	D1	getting in
2021-08-25 17:59:36	Pteronura brasiliensis	D1	getting out
2021-08-25 17:59:36	Pteronura brasiliensis	D1	getting out
2021-08-25 17:59:37	Pteronura brasiliensis	D1	getting out
2021-08-25 18:00:54	Pteronura brasiliensis	D1	getting in
2021-08-25 18:00:55	Pteronura brasiliensis	D1	getting in
2021-08-25 18:00:55	Pteronura brasiliensis	D1	getting in
2021-08-25 18:01:38	Pteronura brasiliensis	D1	getting in and out
2021-08-25 18:02:24	Pteronura brasiliensis	D1	getting out
2021-08-25 18:02:25	Pteronura brasiliensis	D1	getting out
2021-08-25 18:02:25	Pteronura brasiliensis	D1	getting out
2021-08-25 18:04:05	Pteronura brasiliensis	D1	getting in
2021-08-25 18:04:06	Pteronura brasiliensis	D1	getting in
2021-08-25 18:04:06	Pteronura brasiliensis	D1	getting in
2021-08-25 18:04:48	Pteronura brasiliensis	D1	getting in
2021-08-25 18:05:29	Pteronura brasiliensis	D1	getting out
2021-08-25 18:05:30	Pteronura brasiliensis	D1	getting out
2021-08-25 18:05:30	Pteronura brasiliensis	D1	getting out
2021-08-25 18:06:12	Pteronura brasiliensis	D1	getting out
2021-08-26 08:37:40	Pteronura brasiliensis	D1	getting in
2021-08-26 08:37:40	Pteronura brasiliensis	D1	getting in
2021-08-26 08:37:41	Pteronura brasiliensis	D1	getting in
2021-08-26 08:38:22	Pteronura brasiliensis	D1	getting in
2021-08-26 08:38:36	Pteronura brasiliensis	D1	getting in
2021-08-26 08:38:36	Pteronura brasiliensis	D1	getting in
2021-08-26 08:38:36	Pteronura brasiliensis	D1	getting in
2021-08-26 08:39:18	Pteronura brasiliensis	D1	getting out
2021-08-26 08:39:29	Pteronura brasiliensis	D1	getting in
2021-08-26 08:39:29	Pteronura brasiliensis	D1	getting in
2021-08-26 08:39:30	Pteronura brasiliensis	D1	getting in
2021-08-26 08:40:10	Pteronura brasiliensis	D1	getting out
2021-08-26 08:41:22	Pteronura brasiliensis	D1	getting out
2021-08-26 08:41:22	Pteronura brasiliensis	D1	getting out
2021-08-26 08:41:23	Pteronura brasiliensis	D1	getting out
2021-08-26 13:58:48	Pteronura brasiliensis	D1	getting in
2021-08-26 13:58:48	Pteronura brasiliensis	D1	getting in
2021-08-26 13:58:49	Pteronura brasiliensis	D1	getting in
2021-08-26 13:59:32	Pteronura brasiliensis	D1	getting in
2021-08-26 14:00:59	Pteronura brasiliensis	D1	in front
2021-08-26 14:01:00	Pteronura brasiliensis	D1	in front
2021-08-26 14:01:00	Pteronura brasiliensis	D1	in front
2021-08-26 14:01:42	Pteronura brasiliensis	D1	getting out
2021-08-26 14:02:03	Pteronura brasiliensis	D1	getting out
2021-08-26 14:02:04	Pteronura brasiliensis	D1	getting out
2021-08-26 14:02:04	Pteronura brasiliensis	D1	getting out
2021-08-26 14:02:53	Pteronura brasiliensis	D1	getting in
2021-08-26 14:02:54	Pteronura brasiliensis	D1	getting in
2021-08-26 14:02:54	Pteronura brasiliensis	D1	getting in
2021-08-26 14:03:36	Pteronura brasiliensis	D1	getting in
2021-08-26 14:03:46	Pteronura brasiliensis	D1	getting out
2021-08-26 14:03:47	Pteronura brasiliensis	D1	getting out
2021-08-26 14:03:47	Pteronura brasiliensis	D1	getting out
2021-08-26 14:04:30	Pteronura brasiliensis	D1	getting in
2021-08-26 14:05:06	Pteronura brasiliensis	D1	getting out
2021-08-26 14:05:07	Pteronura brasiliensis	D1	getting out
2021-08-26 14:05:07	Pteronura brasiliensis	D1	getting out
2021-08-29 17:01:36	Pteronura brasiliensis	D1	getting in
2021-08-29 17:01:37	Pteronura brasiliensis	D1	getting in
2021-08-29 17:01:37	Pteronura brasiliensis	D1	getting in
2021-08-29 17:02:20	Pteronura brasiliensis	D1	getting in
2021-08-29 17:04:55	Pteronura brasiliensis	D1	getting out
2021-08-29 17:04:55	Pteronura brasiliensis	D1	getting out
2021-08-29 17:05:38	Pteronura brasiliensis	D1	getting in
2021-08-29 17:06:11	Pteronura brasiliensis	D1	getting out
2021-08-29 17:06:12	Pteronura brasiliensis	D1	getting out
2021-08-29 17:06:12	Pteronura brasiliensis	D1	getting out
2021-08-29 18:09:55	Pteronura brasiliensis	D1	getting in
2021-08-29 18:09:55	Pteronura brasiliensis	D1	getting in
2021-08-29 18:09:56	Pteronura brasiliensis	D1	getting in
2021-08-29 18:10:38	Pteronura brasiliensis	D1	getting in
2021-08-29 18:12:51	Pteronura brasiliensis	D1	getting out
2021-08-29 18:12:52	Pteronura brasiliensis	D1	getting out
2021-08-29 18:12:52	Pteronura brasiliensis	D1	getting out
2021-08-30 09:26:35	Pteronura brasiliensis	D1	getting in
2021-08-30 09:26:36	Pteronura brasiliensis	D1	getting in
2021-08-30 09:26:36	Pteronura brasiliensis	D1	getting in
2021-08-30 09:27:18	Pteronura brasiliensis	D1	getting in
2021-08-30 09:28:02	Pteronura brasiliensis	D1	getting in
2021-08-30 09:28:02	Pteronura brasiliensis	D1	getting in
2021-08-30 09:28:03	Pteronura brasiliensis	D1	getting in
2021-08-30 09:28:46	Pteronura brasiliensis	D1	getting out
2021-08-30 09:29:56	Pteronura brasiliensis	D1	getting out
2021-08-30 09:30:33	Pteronura brasiliensis	D1	getting in
2021-08-30 09:30:33	Pteronura brasiliensis	D1	getting in
2021-08-30 09:30:34	Pteronura brasiliensis	D1	getting in
2021-08-30 09:31:22	Pteronura brasiliensis	D1	getting out
2021-08-30 09:31:23	Pteronura brasiliensis	D1	getting out
2021-08-30 09:31:23	Pteronura brasiliensis	D1	getting out
2021-08-30 16:08:43	Pteronura brasiliensis	D1	getting in
2021-08-30 16:08:44	Pteronura brasiliensis	D1	getting in
2021-08-30 16:08:44	Pteronura brasiliensis	D1	getting in
2021-08-30 16:12:05	Pteronura brasiliensis	D1	getting out
2021-08-30 16:12:05	Pteronura brasiliensis	D1	getting out
2021-08-30 16:12:06	Pteronura brasiliensis	D1	getting out
2021-08-30 16:12:48	Pteronura brasiliensis	D1	getting out
2021-08-30 16:12:57	Pteronura brasiliensis	D1	getting in
2021-08-30 16:12:57	Pteronura brasiliensis	D1	getting in
2021-08-30 16:12:58	Pteronura brasiliensis	D1	getting in
2021-08-30 16:14:18	Pteronura brasiliensis	D1	getting out
2021-08-30 16:14:19	Pteronura brasiliensis	D1	getting out
2021-08-30 16:14:19	Pteronura brasiliensis	D1	getting out
2021-08-30 16:15:02	Pteronura brasiliensis	D1	getting in
2021-08-30 16:16:32	Pteronura brasiliensis	D1	getting in
2021-08-30 16:17:14	Pteronura brasiliensis	D1	getting out
2021-08-30 16:17:14	Pteronura brasiliensis	D1	getting out
2021-09-02 15:50:19	Pteronura brasiliensis	D1	getting in
2021-09-02 15:50:20	Pteronura brasiliensis	D1	getting in
2021-09-02 15:50:20	Pteronura brasiliensis	D1	getting in
2021-09-02 15:51:02	Pteronura brasiliensis	D1	getting in
2021-09-02 15:51:54	Pteronura brasiliensis	D1	getting out
2021-09-02 15:52:08	Pteronura brasiliensis	D1	getting in
2021-09-02 15:52:09	Pteronura brasiliensis	D1	getting in
2021-09-02 15:52:09	Pteronura brasiliensis	D1	getting in
2021-09-02 15:52:52	Pteronura brasiliensis	D1	getting out
2021-09-02 15:53:00	Pteronura brasiliensis	D1	getting in
2021-09-02 15:53:00	Pteronura brasiliensis	D1	getting in
2021-09-02 15:53:01	Pteronura brasiliensis	D1	getting in
2021-09-02 15:53:42	Pteronura brasiliensis	D1	getting out
2021-09-02 15:53:58	Pteronura brasiliensis	D1	getting in
2021-09-02 15:53:59	Pteronura brasiliensis	D1	getting in
2021-09-02 15:53:59	Pteronura brasiliensis	D1	getting in
2021-09-02 15:54:42	Pteronura brasiliensis	D1	getting in and out
2021-09-02 15:55:26	Pteronura brasiliensis	D1	getting out
2021-09-02 15:55:27	Pteronura brasiliensis	D1	getting out
2021-09-02 15:55:27	Pteronura brasiliensis	D1	getting out
2021-09-12 11:05:10	Pteronura brasiliensis	D1	getting in
2021-09-12 11:05:10	Pteronura brasiliensis	D1	getting in
2021-09-12 11:05:11	Pteronura brasiliensis	D1	getting in
2021-09-12 11:05:52	Pteronura brasiliensis	D1	getting in
2021-09-12 11:06:49	Pteronura brasiliensis	D1	getting out
2021-09-12 11:06:49	Pteronura brasiliensis	D1	getting out
2021-09-12 11:06:49	Pteronura brasiliensis	D1	getting out
2021-09-15 11:22:00	Pteronura brasiliensis	D1	getting in
2021-09-15 11:22:01	Pteronura brasiliensis	D1	getting in
2021-09-15 11:22:01	Pteronura brasiliensis	D1	getting in
2021-09-15 11:22:44	Pteronura brasiliensis	D1	getting in
2021-09-15 11:23:19	Pteronura brasiliensis	D1	getting out
2021-09-15 11:23:19	Pteronura brasiliensis	D1	getting out
2021-09-15 11:23:20	Pteronura brasiliensis	D1	getting out
2021-09-15 11:24:24	Pteronura brasiliensis	D1	getting in
2021-09-15 11:24:25	Pteronura brasiliensis	D1	getting in
2021-09-15 11:24:25	Pteronura brasiliensis	D1	getting in
2021-09-15 11:59:12	Pteronura brasiliensis	D1	getting out
2021-09-15 11:59:13	Pteronura brasiliensis	D1	getting out
2021-09-15 11:59:13	Pteronura brasiliensis	D1	getting out
2021-09-15 11:59:56	Pteronura brasiliensis	D1	getting out
2021-09-15 12:07:58	Pteronura brasiliensis	D1	getting in
2021-09-15 12:07:59	Pteronura brasiliensis	D1	getting in
2021-09-15 12:07:59	Pteronura brasiliensis	D1	getting in
2021-09-15 12:08:42	Pteronura brasiliensis	D1	getting in
2021-09-15 12:09:24	Pteronura brasiliensis	D1	getting in
2021-09-15 12:09:25	Pteronura brasiliensis	D1	getting in
2021-09-15 12:09:25	Pteronura brasiliensis	D1	getting in
2021-09-15 12:10:08	Pteronura brasiliensis	D1	getting in
2021-09-15 12:10:47	Pteronura brasiliensis	D1	getting out
2021-09-15 12:10:47	Pteronura brasiliensis	D1	getting out
2021-09-15 12:10:48	Pteronura brasiliensis	D1	getting out
2021-09-15 12:11:28	Pteronura brasiliensis	D1	getting out
2021-09-15 13:26:39	Pteronura brasiliensis	D1	getting in
2021-09-15 13:26:39	Pteronura brasiliensis	D1	getting in
2021-09-15 13:26:40	Pteronura brasiliensis	D1	getting in
2021-09-15 13:27:20	Pteronura brasiliensis	D1	getting in and out
2021-09-15 13:28:22	Pteronura brasiliensis	D1	getting out
2021-09-15 13:28:22	Pteronura brasiliensis	D1	getting out
2021-09-15 13:28:23	Pteronura brasiliensis	D1	getting out
2021-09-15 13:29:09	Pteronura brasiliensis	D1	getting in
2021-09-15 13:29:09	Pteronura brasiliensis	D1	getting in
2021-09-15 13:29:10	Pteronura brasiliensis	D1	getting in
2021-09-15 13:29:52	Pteronura brasiliensis	D1	getting out
2021-09-15 17:53:26	Pteronura brasiliensis	D1	in front
2021-09-15 17:54:24	Pteronura brasiliensis	D1	getting in
2021-09-15 18:38:55	Pteronura brasiliensis	D1	getting in
2021-09-15 18:38:56	Pteronura brasiliensis	D1	getting in
2021-09-15 18:38:56	Pteronura brasiliensis	D1	getting in
2021-09-15 18:39:38	Pteronura brasiliensis	D1	in front
2021-09-15 21:09:24	Pteronura brasiliensis	D1	getting out
2021-09-15 21:09:24	Pteronura brasiliensis	D1	getting out
2021-09-15 21:09:25	Pteronura brasiliensis	D1	getting out
2021-09-15 21:10:06	Pteronura brasiliensis	D1	getting out
2021-09-15 21:32:09	Pteronura brasiliensis	D1	getting in
2021-09-15 21:32:09	Pteronura brasiliensis	D1	getting in
2021-09-15 21:32:10	Pteronura brasiliensis	D1	getting in
2021-09-15 21:35:10	Pteronura brasiliensis	D1	getting in
2021-09-15 21:35:11	Pteronura brasiliensis	D1	getting in
2021-09-15 21:35:11	Pteronura brasiliensis	D1	getting in
2021-09-15 21:35:52	Pteronura brasiliensis	D1	getting in
2021-09-15 23:08:44	Pteronura brasiliensis	D1	getting out
2021-09-15 23:08:45	Pteronura brasiliensis	D1	getting out
2021-09-15 23:08:45	Pteronura brasiliensis	D1	getting out
2021-09-16 00:28:24	Pteronura brasiliensis	D1	getting in
2021-09-16 00:28:24	Pteronura brasiliensis	D1	getting in
2021-09-16 00:28:25	Pteronura brasiliensis	D1	getting in
2021-09-16 06:31:19	Pteronura brasiliensis	D1	getting out
2021-09-16 06:31:19	Pteronura brasiliensis	D1	getting out
2021-09-16 06:31:20	Pteronura brasiliensis	D1	getting out
2021-09-16 06:32:00	Pteronura brasiliensis	D1	getting in and out
2021-09-16 06:33:08	Pteronura brasiliensis	D1	getting out
2021-09-16 06:33:09	Pteronura brasiliensis	D1	getting out
2021-09-16 06:33:09	Pteronura brasiliensis	D1	getting out
2021-09-16 08:00:10	Pteronura brasiliensis	D1	getting in
2021-09-16 08:00:10	Pteronura brasiliensis	D1	getting in
2021-09-16 08:00:11	Pteronura brasiliensis	D1	getting in
2021-09-16 08:00:52	Pteronura brasiliensis	D1	getting in
2021-09-16 08:01:49	Pteronura brasiliensis	D1	getting in
2021-09-16 08:01:49	Pteronura brasiliensis	D1	getting in
2021-09-16 08:01:49	Pteronura brasiliensis	D1	getting in
2021-09-16 08:03:24	Pteronura brasiliensis	D1	getting out
2021-09-16 08:03:25	Pteronura brasiliensis	D1	getting out
2021-09-16 08:03:25	Pteronura brasiliensis	D1	getting out
2021-09-16 08:09:46	Pteronura brasiliensis	D1	getting in
2021-09-16 08:09:46	Pteronura brasiliensis	D1	getting in
2021-09-16 08:09:47	Pteronura brasiliensis	D1	getting in
2021-09-16 08:55:18	Pteronura brasiliensis	D1	getting out
2021-09-16 08:55:19	Pteronura brasiliensis	D1	getting out
2021-09-16 08:55:19	Pteronura brasiliensis	D1	getting out
2021-09-16 08:56:02	Pteronura brasiliensis	D1	getting out
2021-09-16 09:00:53	Pteronura brasiliensis	D1	getting out
2021-09-16 09:00:53	Pteronura brasiliensis	D1	getting out
2021-09-16 09:00:54	Pteronura brasiliensis	D1	getting out
2021-09-16 09:01:36	Pteronura brasiliensis	D1	getting in
2021-09-16 09:01:51	Pteronura brasiliensis	D1	getting out
2021-09-16 09:01:52	Pteronura brasiliensis	D1	getting out
2021-09-16 09:01:52	Pteronura brasiliensis	D1	getting out
2021-09-16 09:02:46	Pteronura brasiliensis	D1	getting out
2021-09-16 09:02:46	Pteronura brasiliensis	D1	getting out
2021-09-16 09:02:47	Pteronura brasiliensis	D1	getting out
2021-09-16 09:03:28	Pteronura brasiliensis	D1	in front
2021-09-16 09:04:46	Pteronura brasiliensis	D1	getting in
2021-09-16 09:04:46	Pteronura brasiliensis	D1	getting in
2021-09-16 09:04:47	Pteronura brasiliensis	D1	getting in
2021-09-16 09:08:54	Pteronura brasiliensis	D1	getting out
2021-09-16 09:08:55	Pteronura brasiliensis	D1	getting out
2021-09-16 09:08:55	Pteronura brasiliensis	D1	getting out
2021-09-16 09:25:03	Pteronura brasiliensis	D1	getting in
2021-09-16 09:25:04	Pteronura brasiliensis	D1	getting in
2021-09-16 09:25:04	Pteronura brasiliensis	D1	getting in
2021-09-16 09:48:23	Pteronura brasiliensis	D1	getting in
2021-09-16 09:48:24	Pteronura brasiliensis	D1	getting in
2021-09-16 09:48:24	Pteronura brasiliensis	D1	getting in
2021-09-16 09:55:03	Pteronura brasiliensis	D1	getting in
2021-09-16 09:55:03	Pteronura brasiliensis	D1	getting in
2021-09-16 09:55:04	Pteronura brasiliensis	D1	getting in
2021-09-16 09:55:44	Pteronura brasiliensis	D1	getting in
2021-09-16 09:59:22	Pteronura brasiliensis	D1	getting out
2021-09-16 09:59:23	Pteronura brasiliensis	D1	getting out
2021-09-16 09:59:23	Pteronura brasiliensis	D1	getting out
2021-09-16 10:08:42	Pteronura brasiliensis	D1	getting in
2021-09-16 10:08:42	Pteronura brasiliensis	D1	getting in
2021-09-16 10:08:43	Pteronura brasiliensis	D1	getting in
2021-09-16 10:13:26	Pteronura brasiliensis	D1	getting out
2021-09-16 10:13:26	Pteronura brasiliensis	D1	getting out
2021-09-16 10:13:27	Pteronura brasiliensis	D1	getting out
2021-09-16 10:14:08	Pteronura brasiliensis	D1	getting in and out
2021-09-16 10:15:09	Pteronura brasiliensis	D1	getting out
2021-09-16 10:15:09	Pteronura brasiliensis	D1	getting out
2021-09-16 10:15:10	Pteronura brasiliensis	D1	getting out
2021-09-16 10:15:52	Pteronura brasiliensis	D1	in front
2021-09-16 10:18:51	Pteronura brasiliensis	D1	getting in
2021-09-16 10:18:52	Pteronura brasiliensis	D1	getting in
2021-09-16 10:18:52	Pteronura brasiliensis	D1	getting in
2021-09-16 10:21:03	Pteronura brasiliensis	D1	getting in
2021-09-16 10:21:04	Pteronura brasiliensis	D1	getting in
2021-09-16 10:21:04	Pteronura brasiliensis	D1	getting in
2021-09-16 10:25:41	Pteronura brasiliensis	D1	getting out
2021-09-16 10:25:41	Pteronura brasiliensis	D1	getting out
2021-09-16 10:25:42	Pteronura brasiliensis	D1	getting out
2021-09-16 10:26:24	Pteronura brasiliensis	D1	getting in
2021-09-16 10:26:55	Pteronura brasiliensis	D1	getting out
2021-09-16 10:26:55	Pteronura brasiliensis	D1	getting out
2021-09-16 10:26:56	Pteronura brasiliensis	D1	getting out
2021-09-16 10:49:15	Pteronura brasiliensis	D1	getting in
2021-09-16 10:49:16	Pteronura brasiliensis	D1	getting in
2021-09-16 10:49:16	Pteronura brasiliensis	D1	getting in
2021-09-16 10:52:42	Pteronura brasiliensis	D1	getting out
2021-09-16 10:52:42	Pteronura brasiliensis	D1	getting out
2021-09-16 10:52:43	Pteronura brasiliensis	D1	getting out
2021-09-16 13:00:42	Pteronura brasiliensis	D1	getting in
2021-09-16 13:00:42	Pteronura brasiliensis	D1	getting in
2021-09-16 13:00:43	Pteronura brasiliensis	D1	getting in
2021-09-16 13:04:15	Pteronura brasiliensis	D1	getting in
2021-09-16 13:04:16	Pteronura brasiliensis	D1	getting in
2021-09-16 13:04:16	Pteronura brasiliensis	D1	getting in
2021-09-16 13:09:30	Pteronura brasiliensis	D1	getting in
2021-09-16 13:09:31	Pteronura brasiliensis	D1	getting in
2021-09-16 13:09:31	Pteronura brasiliensis	D1	getting in
2021-09-16 14:03:57	Pteronura brasiliensis	D1	getting out
2021-09-16 14:03:58	Pteronura brasiliensis	D1	getting out
2021-09-16 14:03:58	Pteronura brasiliensis	D1	getting out
2021-09-16 14:04:42	Pteronura brasiliensis	D1	getting out
2021-09-16 14:07:17	Pteronura brasiliensis	D1	getting in
2021-09-16 14:07:17	Pteronura brasiliensis	D1	getting in
2021-09-16 14:07:18	Pteronura brasiliensis	D1	getting in
2021-09-16 14:08:00	Pteronura brasiliensis	D1	getting in
2021-09-16 14:08:59	Pteronura brasiliensis	D1	getting out
2021-09-16 14:09:00	Pteronura brasiliensis	D1	getting out
2021-09-16 14:09:00	Pteronura brasiliensis	D1	getting out
2021-09-16 14:09:42	Pteronura brasiliensis	D1	getting out
2021-09-16 14:10:03	Pteronura brasiliensis	D1	getting out
2021-09-16 14:10:04	Pteronura brasiliensis	D1	getting out
2021-09-16 14:10:04	Pteronura brasiliensis	D1	getting out
2021-09-16 14:10:46	Pteronura brasiliensis	D1	getting in
2021-09-16 14:12:00	Pteronura brasiliensis	D1	getting out
2021-09-16 14:12:01	Pteronura brasiliensis	D1	getting out
2021-09-16 14:12:01	Pteronura brasiliensis	D1	getting out
2021-09-16 15:15:17	Pteronura brasiliensis	D1	getting in
2021-09-16 15:15:17	Pteronura brasiliensis	D1	getting in
2021-09-16 15:15:18	Pteronura brasiliensis	D1	getting in
2021-09-16 15:16:00	Pteronura brasiliensis	D1	getting in
2021-09-16 15:19:47	Pteronura brasiliensis	D1	getting in
2021-09-16 15:19:48	Pteronura brasiliensis	D1	getting in
2021-09-16 15:19:48	Pteronura brasiliensis	D1	getting in
2021-09-16 15:59:50	Pteronura brasiliensis	D1	getting out
2021-09-16 15:59:50	Pteronura brasiliensis	D1	getting out
2021-09-16 15:59:51	Pteronura brasiliensis	D1	getting out
2021-09-16 16:00:57	Pteronura brasiliensis	D1	getting out
2021-09-16 16:00:58	Pteronura brasiliensis	D1	getting out
2021-09-16 16:00:58	Pteronura brasiliensis	D1	getting out
2021-09-16 16:01:40	Pteronura brasiliensis	D1	getting in
2021-09-16 16:02:21	Pteronura brasiliensis	D1	getting out
2021-09-16 16:02:21	Pteronura brasiliensis	D1	getting out
2021-09-16 16:02:22	Pteronura brasiliensis	D1	getting out
2021-09-16 17:23:50	Pteronura brasiliensis	D1	getting in
2021-09-16 17:23:50	Pteronura brasiliensis	D1	getting in
2021-09-16 17:23:51	Pteronura brasiliensis	D1	getting in
2021-09-16 17:24:32	Pteronura brasiliensis	D1	getting out
2021-09-16 17:27:32	Pteronura brasiliensis	D1	getting in
2021-09-16 17:27:33	Pteronura brasiliensis	D1	getting in
2021-09-16 17:27:33	Pteronura brasiliensis	D1	getting in
2021-09-16 17:40:58	Pteronura brasiliensis	D1	getting in
2021-09-16 17:40:59	Pteronura brasiliensis	D1	getting in
2021-09-16 17:40:59	Pteronura brasiliensis	D1	getting in
2021-09-16 17:49:45	Pteronura brasiliensis	D1	getting in
2021-09-16 17:49:45	Pteronura brasiliensis	D1	getting in
2021-09-16 17:49:46	Pteronura brasiliensis	D1	getting in
2021-09-16 18:33:22	Pteronura brasiliensis	D1	getting out
2021-09-16 18:33:22	Pteronura brasiliensis	D1	getting out
2021-09-16 18:33:23	Pteronura brasiliensis	D1	getting out
2021-09-16 18:40:54	Pteronura brasiliensis	D1	getting in
2021-09-16 18:40:55	Pteronura brasiliensis	D1	getting in
2021-09-16 18:40:55	Pteronura brasiliensis	D1	getting in
2021-09-16 20:24:02	Pteronura brasiliensis	D1	getting out
2021-09-16 20:24:03	Pteronura brasiliensis	D1	getting out
2021-09-16 20:40:24	Pteronura brasiliensis	D1	getting in
2021-09-16 20:40:24	Pteronura brasiliensis	D1	getting in
2021-09-16 20:40:25	Pteronura brasiliensis	D1	getting in
2021-09-17 06:36:06	Pteronura brasiliensis	D1	getting out
2021-09-17 06:36:06	Pteronura brasiliensis	D1	getting out
2021-09-17 06:36:07	Pteronura brasiliensis	D1	getting out
2021-09-17 06:36:48	Pteronura brasiliensis	D1	getting out
2021-09-17 06:47:30	Pteronura brasiliensis	D1	getting in
2021-09-17 06:47:31	Pteronura brasiliensis	D1	getting in
2021-09-17 06:47:31	Pteronura brasiliensis	D1	getting in
2021-09-17 06:50:06	Pteronura brasiliensis	D1	getting out
2021-09-17 06:50:06	Pteronura brasiliensis	D1	getting out
2021-09-17 06:50:07	Pteronura brasiliensis	D1	getting out
2021-09-17 06:50:50	Pteronura brasiliensis	D1	getting out
2021-09-17 06:51:49	Pteronura brasiliensis	D1	getting in
2021-09-17 06:51:50	Pteronura brasiliensis	D1	getting in
2021-09-17 06:51:50	Pteronura brasiliensis	D1	getting in
2021-09-17 06:52:32	Pteronura brasiliensis	D1	in front
2021-09-17 11:09:51	Pteronura brasiliensis	D1	getting in
2021-09-17 11:09:51	Pteronura brasiliensis	D1	getting in
2021-09-17 11:09:52	Pteronura brasiliensis	D1	getting in
2021-09-17 11:18:39	Pteronura brasiliensis	D1	getting in
2021-09-17 11:18:39	Pteronura brasiliensis	D1	getting in
2021-09-17 11:18:40	Pteronura brasiliensis	D1	getting in
2021-09-17 11:27:00	Pteronura brasiliensis	D1	getting in
2021-09-17 11:27:01	Pteronura brasiliensis	D1	getting in
2021-09-17 11:27:01	Pteronura brasiliensis	D1	getting in
2021-09-17 11:57:36	Pteronura brasiliensis	D1	getting out
2021-09-17 11:57:36	Pteronura brasiliensis	D1	getting out
2021-09-17 11:57:37	Pteronura brasiliensis	D1	getting out
2021-09-17 11:58:18	Pteronura brasiliensis	D1	getting out
2021-09-17 11:58:53	Pteronura brasiliensis	D1	getting out
2021-09-17 11:58:54	Pteronura brasiliensis	D1	getting out
2021-09-17 11:58:54	Pteronura brasiliensis	D1	getting out
2021-09-17 11:59:36	Pteronura brasiliensis	D1	in front
2021-09-17 12:09:40	Pteronura brasiliensis	D1	getting in
2021-09-17 12:09:40	Pteronura brasiliensis	D1	getting in
2021-09-17 12:09:41	Pteronura brasiliensis	D1	getting in
2021-09-17 12:10:22	Pteronura brasiliensis	D1	getting in
2021-09-17 12:17:23	Pteronura brasiliensis	D1	getting out
2021-09-17 12:17:23	Pteronura brasiliensis	D1	getting out
2021-09-17 12:17:24	Pteronura brasiliensis	D1	getting out
2021-09-17 13:03:50	Pteronura brasiliensis	D1	getting in
2021-09-17 13:03:50	Pteronura brasiliensis	D1	getting in
2021-09-17 13:03:51	Pteronura brasiliensis	D1	getting in
2021-09-17 13:07:32	Pteronura brasiliensis	D1	getting out
2021-09-17 15:55:18	Pteronura brasiliensis	D1	getting in
2021-09-17 15:55:19	Pteronura brasiliensis	D1	getting in
2021-09-17 15:55:19	Pteronura brasiliensis	D1	getting in
2021-09-17 15:56:00	Pteronura brasiliensis	D1	getting in
2021-09-17 15:56:24	Pteronura brasiliensis	D1	getting out
2021-09-17 15:56:25	Pteronura brasiliensis	D1	getting out
2021-09-17 15:56:25	Pteronura brasiliensis	D1	getting out
2021-09-17 16:27:04	Pteronura brasiliensis	D1	getting in
2021-09-17 16:27:04	Pteronura brasiliensis	D1	getting in
2021-09-17 16:27:05	Pteronura brasiliensis	D1	getting in
2021-09-17 16:29:14	Pteronura brasiliensis	D1	getting in
2021-09-17 16:29:15	Pteronura brasiliensis	D1	getting in
2021-09-17 16:29:15	Pteronura brasiliensis	D1	getting in
2021-09-17 16:29:58	Pteronura brasiliensis	D1	getting in
2021-09-17 16:42:03	Pteronura brasiliensis	D1	getting out
2021-09-17 16:42:03	Pteronura brasiliensis	D1	getting out
2021-09-17 16:42:04	Pteronura brasiliensis	D1	getting out
2021-09-17 16:42:46	Pteronura brasiliensis	D1	getting out
2021-09-17 17:24:39	Pteronura brasiliensis	D1	getting in
2021-09-17 17:24:39	Pteronura brasiliensis	D1	getting in
2021-09-17 17:24:40	Pteronura brasiliensis	D1	getting in
2021-09-17 17:32:51	Pteronura brasiliensis	D1	getting out
2021-09-17 17:32:52	Pteronura brasiliensis	D1	getting out
2021-09-17 17:32:52	Pteronura brasiliensis	D1	getting out
2021-09-17 17:33:34	Pteronura brasiliensis	D1	getting out
2021-09-17 17:33:56	Pteronura brasiliensis	D1	getting in
2021-09-17 17:33:57	Pteronura brasiliensis	D1	getting in
2021-09-17 17:33:57	Pteronura brasiliensis	D1	getting in
2021-09-17 17:50:31	Pteronura brasiliensis	D1	getting in
2021-09-17 17:50:31	Pteronura brasiliensis	D1	getting in
2021-09-17 17:50:32	Pteronura brasiliensis	D1	getting in
2021-09-17 18:36:41	Pteronura brasiliensis	D1	getting in
2021-09-17 18:36:41	Pteronura brasiliensis	D1	getting in
2021-09-17 18:36:42	Pteronura brasiliensis	D1	getting in
2021-09-17 18:46:13	Pteronura brasiliensis	D1	getting out
2021-09-17 18:46:13	Pteronura brasiliensis	D1	getting out
2021-09-17 18:46:14	Pteronura brasiliensis	D1	getting out
2021-09-17 18:59:07	Pteronura brasiliensis	D1	getting in
2021-09-17 18:59:08	Pteronura brasiliensis	D1	getting in
2021-09-17 18:59:08	Pteronura brasiliensis	D1	getting in
2021-09-17 23:50:33	Pteronura brasiliensis	D1	getting out
2021-09-17 23:50:33	Pteronura brasiliensis	D1	getting out
2021-09-17 23:50:34	Pteronura brasiliensis	D1	getting out
2021-09-18 00:09:24	Pteronura brasiliensis	D1	getting in
2021-09-18 00:09:24	Pteronura brasiliensis	D1	getting in
2021-09-18 00:09:25	Pteronura brasiliensis	D1	getting in
2021-09-18 06:21:43	Pteronura brasiliensis	D1	getting out
2021-09-18 06:21:43	Pteronura brasiliensis	D1	getting out
2021-09-18 06:21:43	Pteronura brasiliensis	D1	getting out
2021-09-18 06:22:47	Pteronura brasiliensis	D1	getting out
2021-09-18 06:22:48	Pteronura brasiliensis	D1	getting out
2021-09-18 06:22:48	Pteronura brasiliensis	D1	getting out
2021-09-18 10:59:11	Pteronura brasiliensis	D1	getting in
2021-09-18 10:59:12	Pteronura brasiliensis	D1	getting in
2021-09-18 10:59:12	Pteronura brasiliensis	D1	getting in
2021-09-18 10:59:54	Pteronura brasiliensis	D1	getting in
2021-09-18 11:08:46	Pteronura brasiliensis	D1	getting in
2021-09-18 11:08:47	Pteronura brasiliensis	D1	getting in
2021-09-18 11:08:47	Pteronura brasiliensis	D1	getting in
2021-09-18 11:52:31	Pteronura brasiliensis	D1	getting out
2021-09-18 11:52:32	Pteronura brasiliensis	D1	getting out
2021-09-18 11:52:32	Pteronura brasiliensis	D1	getting out
2021-09-18 11:56:39	Pteronura brasiliensis	D1	getting out
2021-09-18 11:56:40	Pteronura brasiliensis	D1	getting out
2021-09-18 11:56:41	Pteronura brasiliensis	D1	getting out
2021-09-18 11:58:52	Pteronura brasiliensis	D1	getting in
2021-09-18 11:58:52	Pteronura brasiliensis	D1	getting in
2021-09-18 11:58:53	Pteronura brasiliensis	D1	getting in
2021-09-18 11:59:34	Pteronura brasiliensis	D1	getting out
2021-09-18 15:57:01	Pteronura brasiliensis	D1	getting in
2021-09-18 15:57:02	Pteronura brasiliensis	D1	getting in
2021-09-18 15:57:02	Pteronura brasiliensis	D1	getting in
2021-09-18 16:03:34	Pteronura brasiliensis	D1	getting in
2021-09-18 16:03:40	Pteronura brasiliensis	D1	getting in
2021-09-18 16:03:40	Pteronura brasiliensis	D1	getting in
2021-09-18 16:03:41	Pteronura brasiliensis	D1	getting in
2021-09-18 16:04:24	Pteronura brasiliensis	D1	getting in and out
2021-09-18 16:05:14	Pteronura brasiliensis	D1	getting in
2021-09-18 16:05:15	Pteronura brasiliensis	D1	getting in
2021-09-18 16:05:15	Pteronura brasiliensis	D1	getting in
2021-09-18 16:06:33	Pteronura brasiliensis	D1	getting in
2021-09-18 16:06:34	Pteronura brasiliensis	D1	getting in
2021-09-18 16:06:34	Pteronura brasiliensis	D1	getting in
2021-09-18 16:07:16	Pteronura brasiliensis	D1	getting out
2021-09-18 16:20:47	Pteronura brasiliensis	D1	getting in
2021-09-18 16:20:47	Pteronura brasiliensis	D1	getting in
2021-09-18 16:20:48	Pteronura brasiliensis	D1	getting in
2021-09-18 16:39:45	Pteronura brasiliensis	D1	getting in
2021-09-18 16:39:46	Pteronura brasiliensis	D1	getting in
2021-09-18 16:39:47	Pteronura brasiliensis	D1	getting in
2021-09-18 16:45:59	Pteronura brasiliensis	D1	getting out
2021-09-18 16:58:22	Pteronura brasiliensis	D1	getting in
2021-09-18 16:58:23	Pteronura brasiliensis	D1	getting in
2021-09-18 16:58:23	Pteronura brasiliensis	D1	getting in
2021-09-18 17:07:14	Pteronura brasiliensis	D1	getting out
2021-09-18 17:07:49	Pteronura brasiliensis	D1	getting in
2021-09-18 17:07:49	Pteronura brasiliensis	D1	getting in
2021-09-18 17:07:50	Pteronura brasiliensis	D1	getting in
2021-09-18 17:10:04	Pteronura brasiliensis	D1	getting out
2021-09-18 17:11:16	Pteronura brasiliensis	D1	getting in
2021-09-18 17:11:16	Pteronura brasiliensis	D1	getting in
2021-09-18 17:11:17	Pteronura brasiliensis	D1	getting in
2021-09-18 17:20:10	Pteronura brasiliensis	D1	getting in
2021-09-18 17:20:11	Pteronura brasiliensis	D1	getting in
2021-09-18 17:20:11	Pteronura brasiliensis	D1	getting in
2021-09-18 17:55:55	Pteronura brasiliensis	D1	getting in
2021-09-18 17:55:55	Pteronura brasiliensis	D1	getting in
2021-09-18 17:55:56	Pteronura brasiliensis	D1	getting in
2021-09-18 17:56:54	Pteronura brasiliensis	D1	getting in
2021-09-18 17:56:55	Pteronura brasiliensis	D1	getting in
2021-09-18 17:56:55	Pteronura brasiliensis	D1	getting in
2021-09-18 17:57:36	Pteronura brasiliensis	D1	getting in
2021-09-19 06:01:13	Pteronura brasiliensis	D1	getting out
2021-09-19 06:01:13	Pteronura brasiliensis	D1	getting out
2021-09-19 06:01:14	Pteronura brasiliensis	D1	getting out
2021-09-19 06:12:54	Pteronura brasiliensis	D1	getting out
2021-09-19 13:52:25	Pteronura brasiliensis	D1	getting in
2021-09-19 13:52:26	Pteronura brasiliensis	D1	getting in
2021-09-19 13:52:27	Pteronura brasiliensis	D1	getting in
2021-09-19 14:03:06	Pteronura brasiliensis	D1	getting in
2021-09-19 14:03:06	Pteronura brasiliensis	D1	getting in
2021-09-19 14:03:07	Pteronura brasiliensis	D1	getting in
2021-09-19 14:03:48	Pteronura brasiliensis	D1	getting in
2021-09-19 15:09:01	Pteronura brasiliensis	D1	getting out
2021-09-19 15:09:02	Pteronura brasiliensis	D1	getting out
2021-09-19 15:09:03	Pteronura brasiliensis	D1	getting out
2021-09-19 15:09:46	Pteronura brasiliensis	D1	getting out
2021-09-19 15:22:50	Pteronura brasiliensis	D1	getting in
2021-09-19 15:22:51	Pteronura brasiliensis	D1	getting in
2021-09-19 15:22:52	Pteronura brasiliensis	D1	getting in
2021-09-19 15:28:01	Pteronura brasiliensis	D1	getting in
2021-09-19 15:28:01	Pteronura brasiliensis	D1	getting in
2021-09-19 15:28:02	Pteronura brasiliensis	D1	getting in
2021-09-19 15:33:38	Pteronura brasiliensis	D1	getting in
2021-09-19 15:33:39	Pteronura brasiliensis	D1	getting in
2021-09-19 15:33:39	Pteronura brasiliensis	D1	getting in
2021-09-19 15:34:35	Pteronura brasiliensis	D1	getting in
2021-09-19 15:34:35	Pteronura brasiliensis	D1	getting in
2021-09-19 15:34:36	Pteronura brasiliensis	D1	getting in
2021-09-19 15:38:18	Pteronura brasiliensis	D1	getting in and out
2021-09-19 15:38:36	Pteronura brasiliensis	D1	getting out
2021-09-19 15:38:36	Pteronura brasiliensis	D1	getting out
2021-09-19 15:38:37	Pteronura brasiliensis	D1	getting out
2021-09-19 15:39:18	Pteronura brasiliensis	D1	getting out
2021-09-28 13:47:24	Pteronura brasiliensis	D1	getting out
2021-09-28 13:47:34	Pteronura brasiliensis	D1	getting in
2021-09-28 13:47:35	Pteronura brasiliensis	D1	getting in
2021-09-28 13:47:35	Pteronura brasiliensis	D1	getting in
2021-09-28 13:48:16	Pteronura brasiliensis	D1	getting in
2021-09-28 13:48:52	Pteronura brasiliensis	D1	getting out
2021-09-28 13:48:53	Pteronura brasiliensis	D1	getting out
2021-09-28 13:48:53	Pteronura brasiliensis	D1	getting out
2021-09-28 13:50:30	Pteronura brasiliensis	D1	getting out
2021-09-28 13:50:31	Pteronura brasiliensis	D1	getting out
2021-09-28 13:50:31	Pteronura brasiliensis	D1	getting out
2021-09-28 13:57:30	Pteronura brasiliensis	D1	getting out
2021-09-28 13:57:31	Pteronura brasiliensis	D1	getting out
2021-09-28 13:57:31	Pteronura brasiliensis	D1	getting out
2021-09-28 13:58:14	Pteronura brasiliensis	D1	getting out
2021-09-28 16:23:17	Pteronura brasiliensis	D1	getting in
2021-09-28 16:23:18	Pteronura brasiliensis	D1	getting in
2021-09-28 16:23:18	Pteronura brasiliensis	D1	getting in
2021-09-28 16:24:00	Pteronura brasiliensis	D1	getting in
2021-09-28 16:24:30	Pteronura brasiliensis	D1	getting in
2021-09-28 16:24:31	Pteronura brasiliensis	D1	getting in
2021-09-28 16:24:31	Pteronura brasiliensis	D1	getting in
2021-09-28 16:25:12	Pteronura brasiliensis	D1	getting in
2021-09-28 16:28:58	Pteronura brasiliensis	D1	getting out
2021-09-28 16:28:59	Pteronura brasiliensis	D1	getting out
2021-09-28 16:28:59	Pteronura brasiliensis	D1	getting out
2021-09-28 16:29:42	Pteronura brasiliensis	D1	getting out
2021-09-28 16:31:43	Pteronura brasiliensis	D1	getting in
2021-09-28 16:31:43	Pteronura brasiliensis	D1	getting in
2021-09-28 16:31:44	Pteronura brasiliensis	D1	getting in
2021-09-28 16:32:26	Pteronura brasiliensis	D1	in front
2021-09-28 16:32:59	Pteronura brasiliensis	D1	getting in
2021-09-28 16:32:59	Pteronura brasiliensis	D1	getting in
2021-09-28 16:33:00	Pteronura brasiliensis	D1	getting in
2021-09-28 16:33:42	Pteronura brasiliensis	D1	getting in
2021-09-28 17:32:04	Pteronura brasiliensis	D1	getting out
2021-09-28 17:32:04	Pteronura brasiliensis	D1	getting out
2021-09-28 17:32:05	Pteronura brasiliensis	D1	getting out
2021-09-28 17:32:46	Pteronura brasiliensis	D1	getting out
2021-09-28 18:15:59	Pteronura brasiliensis	D1	getting in
2021-09-28 18:16:00	Pteronura brasiliensis	D1	getting in
2021-09-28 18:16:00	Pteronura brasiliensis	D1	getting in
2021-09-28 18:16:42	Pteronura brasiliensis	D1	getting in
2021-09-28 18:26:18	Pteronura brasiliensis	D1	getting in
2021-09-28 18:26:19	Pteronura brasiliensis	D1	getting in
2021-09-28 18:26:19	Pteronura brasiliensis	D1	getting in
2021-09-28 19:30:05	Pteronura brasiliensis	D1	getting out
2021-09-28 19:30:05	Pteronura brasiliensis	D1	getting out
2021-09-28 19:30:06	Pteronura brasiliensis	D1	getting out
2021-09-28 19:30:48	Pteronura brasiliensis	D1	in front
2021-09-28 19:37:42	Pteronura brasiliensis	D1	getting in
2021-09-28 19:37:43	Pteronura brasiliensis	D1	getting in
2021-09-28 19:37:43	Pteronura brasiliensis	D1	getting in
2021-09-28 20:06:26	Pteronura brasiliensis	D1	getting in
2021-09-28 20:06:27	Pteronura brasiliensis	D1	getting in
2021-09-28 20:06:27	Pteronura brasiliensis	D1	getting in
2021-09-29 05:52:19	Pteronura brasiliensis	D1	getting out
2021-09-29 05:52:19	Pteronura brasiliensis	D1	getting out
2021-09-29 05:52:20	Pteronura brasiliensis	D1	getting out
2021-09-29 05:53:02	Pteronura brasiliensis	D1	getting out
2021-09-29 05:53:15	Pteronura brasiliensis	D1	getting out
2021-09-29 05:53:15	Pteronura brasiliensis	D1	getting out
2021-09-29 05:53:16	Pteronura brasiliensis	D1	getting out
2021-09-29 05:53:58	Pteronura brasiliensis	D1	getting in
2021-09-29 05:55:32	Pteronura brasiliensis	D1	getting out
2021-09-29 05:55:33	Pteronura brasiliensis	D1	getting out
2021-09-29 05:55:33	Pteronura brasiliensis	D1	getting out
2021-10-02 08:57:50	Pteronura brasiliensis	D1	getting in
2021-10-02 08:57:51	Pteronura brasiliensis	D1	getting in
2021-10-02 08:57:51	Pteronura brasiliensis	D1	getting in
2021-10-02 08:58:34	Pteronura brasiliensis	D1	getting in
2021-10-02 09:05:44	Pteronura brasiliensis	D1	getting out
2021-10-02 09:05:45	Pteronura brasiliensis	D1	getting out
2021-10-02 09:05:45	Pteronura brasiliensis	D1	getting out
2021-10-02 09:06:28	Pteronura brasiliensis	D1	getting out
2021-10-02 10:04:45	Pteronura brasiliensis	D1	getting out
2021-10-02 10:04:46	Pteronura brasiliensis	D1	getting out
2021-10-02 10:04:47	Pteronura brasiliensis	D1	getting out
2021-10-02 10:16:30	Pteronura brasiliensis	D1	getting in
2021-10-02 11:16:47	Pteronura brasiliensis	D1	getting out
2021-10-02 11:16:48	Pteronura brasiliensis	D1	getting out
2021-10-02 11:16:48	Pteronura brasiliensis	D1	getting out
2021-10-02 11:20:35	Pteronura brasiliensis	D1	getting in
2021-10-02 11:20:36	Pteronura brasiliensis	D1	getting in
2021-10-02 11:20:37	Pteronura brasiliensis	D1	getting in
2021-10-02 11:21:37	Pteronura brasiliensis	D1	getting in
2021-10-02 11:21:37	Pteronura brasiliensis	D1	getting in
2021-10-02 11:21:38	Pteronura brasiliensis	D1	getting in
2021-10-02 11:22:20	Pteronura brasiliensis	D1	getting in
2021-10-02 11:25:04	Pteronura brasiliensis	D1	getting out
2021-10-02 11:25:10	Pteronura brasiliensis	D1	getting out
2021-10-02 11:25:11	Pteronura brasiliensis	D1	getting out
2021-10-02 11:25:11	Pteronura brasiliensis	D1	getting out
2021-10-02 12:49:53	Pteronura brasiliensis	D1	getting in
2021-10-02 12:49:54	Pteronura brasiliensis	D1	getting in
2021-10-02 12:49:54	Pteronura brasiliensis	D1	getting in
2021-10-02 12:58:10	Pteronura brasiliensis	D1	in front
2021-10-02 13:14:03	Pteronura brasiliensis	D1	getting out
2021-10-02 13:14:04	Pteronura brasiliensis	D1	getting out
2021-10-02 13:14:04	Pteronura brasiliensis	D1	getting out
2021-10-02 13:14:46	Pteronura brasiliensis	D1	getting out
2021-10-02 13:16:24	Pteronura brasiliensis	D1	getting in
2021-10-02 13:33:25	Pteronura brasiliensis	D1	getting in
2021-10-02 13:33:26	Pteronura brasiliensis	D1	getting in
2021-10-02 13:33:26	Pteronura brasiliensis	D1	getting in
2021-10-02 13:34:08	Pteronura brasiliensis	D1	getting in
2021-10-02 14:09:14	Pteronura brasiliensis	D1	getting in
2021-10-02 15:29:32	Pteronura brasiliensis	D1	getting in
2021-10-02 16:41:18	Pteronura brasiliensis	D1	getting in
2021-10-02 16:41:18	Pteronura brasiliensis	D1	getting in
2021-10-02 16:41:19	Pteronura brasiliensis	D1	getting in
2021-10-02 16:42:00	Pteronura brasiliensis	D1	getting in
2021-10-02 16:47:02	Pteronura brasiliensis	D1	getting in
2021-10-02 16:47:02	Pteronura brasiliensis	D1	getting in
2021-10-02 16:47:03	Pteronura brasiliensis	D1	getting in
2021-10-02 16:47:46	Pteronura brasiliensis	D1	getting out
2021-10-02 16:48:05	Pteronura brasiliensis	D1	getting out
2021-10-02 16:48:05	Pteronura brasiliensis	D1	getting out
2021-10-02 16:48:06	Pteronura brasiliensis	D1	getting out
2021-10-02 16:48:46	Pteronura brasiliensis	D1	getting out
2021-10-04 07:50:47	Pteronura brasiliensis	D1	getting in
2021-10-04 07:50:47	Pteronura brasiliensis	D1	getting in
2021-10-04 07:50:48	Pteronura brasiliensis	D1	getting in
2021-10-04 07:51:28	Pteronura brasiliensis	D1	getting in
2021-10-04 13:55:22	Pteronura brasiliensis	D1	getting out
2021-10-04 16:29:02	Pteronura brasiliensis	D1	getting out
2021-10-04 16:29:15	Pteronura brasiliensis	D1	getting in
2021-10-04 16:29:16	Pteronura brasiliensis	D1	getting in
2021-10-09 17:01:42	Pteronura brasiliensis	D1	getting in
2021-10-09 17:01:42	Pteronura brasiliensis	D1	getting in
2021-10-09 17:01:43	Pteronura brasiliensis	D1	getting in
2021-10-12 10:26:51	Pteronura brasiliensis	D1	getting in
2021-10-12 10:26:51	Pteronura brasiliensis	D1	getting in
2021-10-12 10:26:51	Pteronura brasiliensis	D1	getting in
2021-10-12 10:27:32	Pteronura brasiliensis	D1	getting in and out
2021-10-12 10:33:33	Pteronura brasiliensis	D1	getting in
2021-10-12 10:33:33	Pteronura brasiliensis	D1	getting in
2021-10-12 10:33:34	Pteronura brasiliensis	D1	getting in
2021-10-12 11:10:02	Pteronura brasiliensis	D1	getting in
2021-10-12 11:10:02	Pteronura brasiliensis	D1	getting in
2021-10-12 11:10:03	Pteronura brasiliensis	D1	getting in
2021-10-12 11:12:55	Pteronura brasiliensis	D1	getting out
2021-10-12 11:12:55	Pteronura brasiliensis	D1	getting out
2021-10-12 11:12:55	Pteronura brasiliensis	D1	getting out
2021-10-12 13:35:05	Pteronura brasiliensis	D1	getting in
2021-10-12 13:35:05	Pteronura brasiliensis	D1	getting in
2021-10-12 13:35:06	Pteronura brasiliensis	D1	getting in
2021-10-12 13:35:48	Pteronura brasiliensis	D1	getting in and out
2021-10-12 13:38:12	Pteronura brasiliensis	D1	getting out
2021-10-12 13:38:12	Pteronura brasiliensis	D1	getting out
2021-10-12 13:38:13	Pteronura brasiliensis	D1	getting out
2021-10-12 13:38:54	Pteronura brasiliensis	D1	getting in
2021-10-12 13:40:46	Pteronura brasiliensis	D1	getting out
2021-10-12 13:40:46	Pteronura brasiliensis	D1	getting out
2021-10-12 13:40:47	Pteronura brasiliensis	D1	getting out
2021-10-12 13:41:45	Pteronura brasiliensis	D1	getting in
2021-10-12 13:41:45	Pteronura brasiliensis	D1	getting in
2021-10-12 13:41:46	Pteronura brasiliensis	D1	getting in
2021-10-12 13:42:28	Pteronura brasiliensis	D1	getting in
2021-10-12 13:43:20	Pteronura brasiliensis	D1	getting out
2021-10-12 13:43:21	Pteronura brasiliensis	D1	getting out
2021-10-12 13:43:21	Pteronura brasiliensis	D1	getting out
2021-10-12 13:44:02	Pteronura brasiliensis	D1	getting out
2021-10-12 15:27:30	Pteronura brasiliensis	D1	getting in
2021-10-12 15:27:31	Pteronura brasiliensis	D1	getting in
2021-10-12 15:27:31	Pteronura brasiliensis	D1	getting in
2021-10-12 15:28:14	Pteronura brasiliensis	D1	getting in
2021-10-12 15:30:23	Pteronura brasiliensis	D1	getting out
2021-10-12 15:30:24	Pteronura brasiliensis	D1	getting out
2021-10-12 15:30:24	Pteronura brasiliensis	D1	getting out
2021-10-12 15:31:06	Pteronura brasiliensis	D1	getting out
2021-10-12 16:09:56	Pteronura brasiliensis	D1	getting in
2021-10-12 16:09:57	Pteronura brasiliensis	D1	getting in
2021-10-12 16:09:57	Pteronura brasiliensis	D1	getting in
2021-10-12 16:10:38	Pteronura brasiliensis	D1	getting in and out
2021-10-12 16:10:45	Pteronura brasiliensis	D1	getting in
2021-10-12 16:10:45	Pteronura brasiliensis	D1	getting in
2021-10-12 16:10:46	Pteronura brasiliensis	D1	getting in
2021-10-12 16:11:28	Pteronura brasiliensis	D1	getting in
2021-10-12 16:51:22	Pteronura brasiliensis	D1	getting out
2021-10-12 16:51:22	Pteronura brasiliensis	D1	getting out
2021-10-12 16:51:22	Pteronura brasiliensis	D1	getting out
2021-10-12 16:52:04	Pteronura brasiliensis	D1	in front
2021-10-12 16:52:20	Pteronura brasiliensis	D1	getting out
2021-10-12 16:52:21	Pteronura brasiliensis	D1	getting out
2021-10-12 16:52:21	Pteronura brasiliensis	D1	getting out
2021-10-12 16:53:04	Pteronura brasiliensis	D1	getting in
2021-10-12 16:53:13	Pteronura brasiliensis	D1	getting out
2021-10-12 16:53:14	Pteronura brasiliensis	D1	getting out
2021-10-12 16:53:14	Pteronura brasiliensis	D1	getting out
2021-10-12 16:53:56	Pteronura brasiliensis	D1	getting in
2021-10-12 16:54:39	Pteronura brasiliensis	D1	getting out
2021-10-12 16:54:40	Pteronura brasiliensis	D1	getting out
2021-10-12 16:54:40	Pteronura brasiliensis	D1	getting out
2021-10-12 16:55:22	Pteronura brasiliensis	D1	getting out
2021-10-12 17:31:31	Pteronura brasiliensis	D1	getting in
2021-10-12 17:31:31	Pteronura brasiliensis	D1	getting in
2021-10-12 17:31:32	Pteronura brasiliensis	D1	getting in
2021-10-12 17:32:14	Pteronura brasiliensis	D1	getting in
2021-10-12 17:33:17	Pteronura brasiliensis	D1	getting in
2021-10-12 17:33:17	Pteronura brasiliensis	D1	getting in
2021-10-12 17:33:18	Pteronura brasiliensis	D1	getting in
2021-10-12 22:03:14	Pteronura brasiliensis	D1	getting in
2021-10-12 22:03:15	Pteronura brasiliensis	D1	getting in
2021-10-12 22:03:15	Pteronura brasiliensis	D1	getting in
2021-10-12 22:03:58	Pteronura brasiliensis	D1	getting in
2021-10-13 06:22:00	Pteronura brasiliensis	D1	getting out
2021-10-13 06:22:00	Pteronura brasiliensis	D1	getting out
2021-10-13 06:22:01	Pteronura brasiliensis	D1	getting out
2021-10-13 06:22:44	Pteronura brasiliensis	D1	getting out
2021-10-13 10:32:18	Pteronura brasiliensis	D1	getting in
2021-10-13 10:32:19	Pteronura brasiliensis	D1	getting in
2021-10-13 10:32:19	Pteronura brasiliensis	D1	getting in
2021-10-13 10:33:02	Pteronura brasiliensis	D1	getting in
2021-10-13 11:24:47	Pteronura brasiliensis	D1	getting out
2021-10-13 11:24:48	Pteronura brasiliensis	D1	getting out
2021-10-13 11:24:48	Pteronura brasiliensis	D1	getting out
2021-10-13 11:26:29	Pteronura brasiliensis	D1	getting out
2021-10-13 11:26:29	Pteronura brasiliensis	D1	getting out
2021-10-13 11:26:30	Pteronura brasiliensis	D1	getting out
2021-10-13 11:27:10	Pteronura brasiliensis	D1	getting in
2021-10-13 11:27:43	Pteronura brasiliensis	D1	getting out
2021-10-13 11:27:43	Pteronura brasiliensis	D1	getting out
2021-10-13 11:27:44	Pteronura brasiliensis	D1	getting out
2021-10-13 11:28:26	Pteronura brasiliensis	D1	getting in and out
2021-10-13 13:08:52	Pteronura brasiliensis	D1	getting in
2021-10-13 13:08:53	Pteronura brasiliensis	D1	getting in
2021-10-13 13:08:53	Pteronura brasiliensis	D1	getting in
2021-10-13 13:10:24	Pteronura brasiliensis	D1	getting in
2021-10-13 13:10:24	Pteronura brasiliensis	D1	getting in
2021-10-13 13:10:24	Pteronura brasiliensis	D1	getting in
2021-10-13 13:12:58	Pteronura brasiliensis	D1	getting out
2021-10-13 13:12:59	Pteronura brasiliensis	D1	getting out
2021-10-13 13:12:59	Pteronura brasiliensis	D1	getting out
2021-10-13 13:23:40	Pteronura brasiliensis	D1	getting in
2021-10-13 13:23:41	Pteronura brasiliensis	D1	getting in
2021-10-13 13:23:41	Pteronura brasiliensis	D1	getting in
2021-10-13 13:24:22	Pteronura brasiliensis	D1	getting in
2021-10-13 13:29:34	Pteronura brasiliensis	D1	getting out
2021-10-13 13:29:35	Pteronura brasiliensis	D1	getting out
2021-10-13 13:29:35	Pteronura brasiliensis	D1	getting out
2021-10-13 13:32:43	Pteronura brasiliensis	D1	getting in
2021-10-13 13:32:43	Pteronura brasiliensis	D1	getting in
2021-10-13 13:32:44	Pteronura brasiliensis	D1	getting in
2021-10-13 14:11:49	Pteronura brasiliensis	D1	getting out
2021-10-13 14:11:50	Pteronura brasiliensis	D1	getting out
2021-10-13 14:11:50	Pteronura brasiliensis	D1	getting out
2021-10-13 14:12:32	Pteronura brasiliensis	D1	getting out
2021-10-13 15:41:09	Pteronura brasiliensis	D1	getting in
2021-10-13 15:41:10	Pteronura brasiliensis	D1	getting in
2021-10-13 15:41:10	Pteronura brasiliensis	D1	getting in
2021-10-13 15:41:52	Pteronura brasiliensis	D1	getting out
2021-10-13 15:42:49	Pteronura brasiliensis	D1	getting in
2021-10-13 15:42:49	Pteronura brasiliensis	D1	getting in
2021-10-13 15:42:50	Pteronura brasiliensis	D1	getting in
2021-10-13 15:45:49	Pteronura brasiliensis	D1	getting out
2021-10-13 15:45:50	Pteronura brasiliensis	D1	getting out
2021-10-13 15:45:50	Pteronura brasiliensis	D1	getting out
2021-10-13 15:47:15	Pteronura brasiliensis	D1	getting in
2021-10-13 15:47:15	Pteronura brasiliensis	D1	getting in
2021-10-13 15:47:16	Pteronura brasiliensis	D1	getting in
2021-10-13 15:47:58	Pteronura brasiliensis	D1	getting in
2021-10-13 15:49:59	Pteronura brasiliensis	D1	getting out
2021-10-13 15:50:00	Pteronura brasiliensis	D1	getting out
2021-10-13 15:50:00	Pteronura brasiliensis	D1	getting out
2021-10-13 15:50:42	Pteronura brasiliensis	D1	getting in
2021-10-13 16:01:17	Pteronura brasiliensis	D1	getting in
2021-10-13 16:01:18	Pteronura brasiliensis	D1	getting in
2021-10-13 16:01:18	Pteronura brasiliensis	D1	getting in
2021-10-13 16:42:19	Pteronura brasiliensis	D1	getting out
2021-10-13 16:42:19	Pteronura brasiliensis	D1	getting out
2021-10-13 16:42:20	Pteronura brasiliensis	D1	getting out
2021-10-13 16:43:13	Pteronura brasiliensis	D1	getting out
2021-10-13 16:43:14	Pteronura brasiliensis	D1	getting out
2021-10-13 16:43:14	Pteronura brasiliensis	D1	getting out
2021-10-13 16:45:59	Pteronura brasiliensis	D1	getting out
2021-10-13 16:45:59	Pteronura brasiliensis	D1	getting out
2021-10-13 16:46:00	Pteronura brasiliensis	D1	getting out
2021-10-13 16:46:40	Pteronura brasiliensis	D1	getting out
2021-10-13 17:06:16	Pteronura brasiliensis	D1	getting in
2021-10-13 17:06:17	Pteronura brasiliensis	D1	getting in
2021-10-13 17:06:17	Pteronura brasiliensis	D1	getting in
2021-10-13 17:44:38	Pteronura brasiliensis	D1	getting in
2021-10-13 17:44:38	Pteronura brasiliensis	D1	getting in
2021-10-13 17:44:39	Pteronura brasiliensis	D1	getting in
2021-10-13 17:45:20	Pteronura brasiliensis	D1	getting in
2021-10-13 17:46:46	Pteronura brasiliensis	D1	getting out
2021-10-13 17:46:46	Pteronura brasiliensis	D1	getting out
2021-10-13 17:46:47	Pteronura brasiliensis	D1	getting out
2021-10-13 17:47:30	Pteronura brasiliensis	D1	getting in
2021-10-13 17:49:47	Pteronura brasiliensis	D1	getting in
2021-10-13 17:49:48	Pteronura brasiliensis	D1	getting in
2021-10-13 17:49:48	Pteronura brasiliensis	D1	getting in
2021-10-13 17:51:16	Pteronura brasiliensis	D1	getting out
2021-10-13 17:51:17	Pteronura brasiliensis	D1	getting out
2021-10-13 17:51:17	Pteronura brasiliensis	D1	getting out
2021-10-13 17:52:00	Pteronura brasiliensis	D1	getting in
2021-10-13 18:21:45	Pteronura brasiliensis	D1	getting out
2021-10-13 18:21:45	Pteronura brasiliensis	D1	getting out
2021-10-13 18:21:46	Pteronura brasiliensis	D1	getting out
2021-10-13 18:22:28	Pteronura brasiliensis	D1	getting out
2021-10-13 18:23:06	Pteronura brasiliensis	D1	getting out
2021-10-13 18:23:07	Pteronura brasiliensis	D1	getting out
2021-10-13 18:23:07	Pteronura brasiliensis	D1	getting out
2021-10-13 18:23:50	Pteronura brasiliensis	D1	getting in and out
2021-10-13 18:31:20	Pteronura brasiliensis	D1	getting in
2021-10-13 18:31:21	Pteronura brasiliensis	D1	getting in
2021-10-13 18:31:21	Pteronura brasiliensis	D1	getting in
2021-10-13 18:34:28	Pteronura brasiliensis	D1	getting in
2021-10-13 18:34:28	Pteronura brasiliensis	D1	getting in
2021-10-13 18:34:29	Pteronura brasiliensis	D1	getting in
2021-10-13 18:54:36	Pteronura brasiliensis	D1	getting in
2021-10-13 18:54:37	Pteronura brasiliensis	D1	getting in
2021-10-13 18:54:37	Pteronura brasiliensis	D1	getting in
2021-10-13 19:22:59	Pteronura brasiliensis	D1	getting out
2021-10-13 19:22:59	Pteronura brasiliensis	D1	getting out
2021-10-13 19:23:00	Pteronura brasiliensis	D1	getting out
2021-10-13 19:57:49	Pteronura brasiliensis	D1	getting in
2021-10-13 19:57:49	Pteronura brasiliensis	D1	getting in
2021-10-13 19:57:50	Pteronura brasiliensis	D1	getting in
2021-10-14 05:56:46	Pteronura brasiliensis	D1	getting out
2021-10-14 05:56:46	Pteronura brasiliensis	D1	getting out
2021-10-14 05:56:46	Pteronura brasiliensis	D1	getting out
2021-10-14 05:57:28	Pteronura brasiliensis	D1	getting out
2021-10-14 05:57:39	Pteronura brasiliensis	D1	getting out
2021-10-14 05:57:39	Pteronura brasiliensis	D1	getting out
2021-10-14 05:57:40	Pteronura brasiliensis	D1	getting out
2021-10-14 10:27:42	Pteronura brasiliensis	D1	getting in
2021-10-14 10:27:42	Pteronura brasiliensis	D1	getting in
2021-10-14 10:27:43	Pteronura brasiliensis	D1	getting in
2021-10-14 10:28:24	Pteronura brasiliensis	D1	getting in
2021-10-14 11:20:03	Pteronura brasiliensis	D1	getting out
2021-10-14 11:20:04	Pteronura brasiliensis	D1	getting out
2021-10-14 11:20:04	Pteronura brasiliensis	D1	getting out
2021-10-14 11:23:30	Pteronura brasiliensis	D1	getting in
2021-10-14 11:23:31	Pteronura brasiliensis	D1	getting in
2021-10-14 11:23:31	Pteronura brasiliensis	D1	getting in
2021-10-14 11:33:02	Pteronura brasiliensis	D1	getting out
2021-10-14 11:33:02	Pteronura brasiliensis	D1	getting out
2021-10-14 11:33:03	Pteronura brasiliensis	D1	getting out
2021-10-14 11:33:46	Pteronura brasiliensis	D1	getting out
2021-10-14 11:45:21	Pteronura brasiliensis	D1	getting in
2021-10-14 11:45:22	Pteronura brasiliensis	D1	getting in
2021-10-14 11:45:22	Pteronura brasiliensis	D1	getting in
2021-10-14 11:47:52	Pteronura brasiliensis	D1	getting out
2021-10-14 11:47:53	Pteronura brasiliensis	D1	getting out
2021-10-14 11:47:53	Pteronura brasiliensis	D1	getting out
2021-10-14 11:48:34	Pteronura brasiliensis	D1	getting out
2021-10-14 11:58:22	Pteronura brasiliensis	D1	getting in
2021-10-14 11:58:23	Pteronura brasiliensis	D1	getting in
2021-10-14 11:58:23	Pteronura brasiliensis	D1	getting in
2021-10-14 12:06:17	Pteronura brasiliensis	D1	getting out
2021-10-14 12:06:17	Pteronura brasiliensis	D1	getting out
2021-10-14 12:06:18	Pteronura brasiliensis	D1	getting out
2021-10-14 12:09:01	Pteronura brasiliensis	D1	getting in
2021-10-14 12:09:01	Pteronura brasiliensis	D1	getting in
2021-10-14 12:09:02	Pteronura brasiliensis	D1	getting in
2021-10-14 12:09:44	Pteronura brasiliensis	D1	getting in
2021-10-14 12:13:11	Pteronura brasiliensis	D1	getting out
2021-10-14 12:13:12	Pteronura brasiliensis	D1	getting out
2021-10-14 12:13:12	Pteronura brasiliensis	D1	getting out
2021-10-14 12:57:42	Pteronura brasiliensis	D1	getting in
2021-10-14 12:57:43	Pteronura brasiliensis	D1	getting in
2021-10-14 12:57:43	Pteronura brasiliensis	D1	getting in
2021-10-14 13:02:18	Pteronura brasiliensis	D1	getting out
2021-10-14 13:02:18	Pteronura brasiliensis	D1	getting out
2021-10-14 13:02:19	Pteronura brasiliensis	D1	getting out
2021-10-14 13:03:02	Pteronura brasiliensis	D1	getting in
2021-10-14 13:03:51	Pteronura brasiliensis	D1	getting out
2021-10-14 13:03:52	Pteronura brasiliensis	D1	getting out
2021-10-14 13:03:52	Pteronura brasiliensis	D1	getting out
2021-10-14 13:06:50	Pteronura brasiliensis	D1	getting out
2021-10-14 13:06:51	Pteronura brasiliensis	D1	getting out
2021-10-14 13:06:51	Pteronura brasiliensis	D1	getting out
2021-10-16 09:43:14	Pteronura brasiliensis	D1	getting in
2021-10-16 09:43:14	Pteronura brasiliensis	D1	getting in
2021-10-16 09:43:15	Pteronura brasiliensis	D1	getting in
2021-10-16 09:43:56	Pteronura brasiliensis	D1	getting out
2021-10-16 13:57:23	Pteronura brasiliensis	D1	getting in
2021-10-16 13:57:24	Pteronura brasiliensis	D1	getting in
2021-10-16 13:57:24	Pteronura brasiliensis	D1	getting in
2021-10-16 13:58:06	Pteronura brasiliensis	D1	getting in and out
2021-10-16 14:07:23	Pteronura brasiliensis	D1	getting in
2021-10-16 14:07:23	Pteronura brasiliensis	D1	getting in
2021-10-16 14:07:24	Pteronura brasiliensis	D1	getting in
2021-10-16 14:08:06	Pteronura brasiliensis	D1	getting in and out
2021-10-16 14:08:48	Pteronura brasiliensis	D1	getting out
2021-10-16 14:08:49	Pteronura brasiliensis	D1	getting out
2021-10-16 14:08:49	Pteronura brasiliensis	D1	getting out
2021-10-16 14:09:32	Pteronura brasiliensis	D1	getting out
2021-10-18 07:34:24	Pteronura brasiliensis	D1	getting in
2021-10-18 07:34:24	Pteronura brasiliensis	D1	getting in
2021-10-18 07:34:25	Pteronura brasiliensis	D1	getting in
2021-10-18 07:35:08	Pteronura brasiliensis	D1	getting out
2021-10-21 09:24:50	Pteronura brasiliensis	D1	getting in
2021-10-21 09:24:51	Pteronura brasiliensis	D1	getting in
2021-10-21 09:24:51	Pteronura brasiliensis	D1	getting in
2021-10-21 09:25:34	Pteronura brasiliensis	D1	getting in
2021-10-21 09:25:55	Pteronura brasiliensis	D1	getting in
2021-10-21 09:25:55	Pteronura brasiliensis	D1	getting in
2021-10-21 09:25:56	Pteronura brasiliensis	D1	getting in
2021-10-21 09:26:38	Pteronura brasiliensis	D1	getting in
2021-10-21 09:26:47	Pteronura brasiliensis	D1	getting in
2021-10-21 09:26:47	Pteronura brasiliensis	D1	getting in
2021-10-21 09:26:48	Pteronura brasiliensis	D1	getting in
2021-10-21 09:27:30	Pteronura brasiliensis	D1	getting out
2021-10-21 09:27:36	Pteronura brasiliensis	D1	getting out
2021-10-21 09:27:36	Pteronura brasiliensis	D1	getting out
2021-10-21 09:27:37	Pteronura brasiliensis	D1	getting out
2021-10-21 09:28:18	Pteronura brasiliensis	D1	getting in and out
2021-10-21 09:28:31	Pteronura brasiliensis	D1	getting out
2021-10-21 09:28:32	Pteronura brasiliensis	D1	getting out
2021-10-21 09:28:32	Pteronura brasiliensis	D1	getting out
2021-10-21 09:29:14	Pteronura brasiliensis	D1	getting out
2021-10-21 09:42:02	Pteronura brasiliensis	D1	getting in
2021-10-21 09:42:03	Pteronura brasiliensis	D1	getting in
2021-10-21 09:42:03	Pteronura brasiliensis	D1	getting in
2021-10-21 09:42:44	Pteronura brasiliensis	D1	getting in
2021-10-21 09:43:08	Pteronura brasiliensis	D1	getting in
2021-10-21 09:43:08	Pteronura brasiliensis	D1	getting in
2021-10-21 09:43:09	Pteronura brasiliensis	D1	getting in
2021-10-21 09:43:50	Pteronura brasiliensis	D1	getting in
2021-10-21 09:44:12	Pteronura brasiliensis	D1	getting out
2021-10-21 09:44:12	Pteronura brasiliensis	D1	getting out
2021-10-21 09:44:13	Pteronura brasiliensis	D1	getting out
2021-10-21 09:47:24	Pteronura brasiliensis	D1	getting out
2021-10-21 09:47:25	Pteronura brasiliensis	D1	getting out
2021-10-21 09:47:25	Pteronura brasiliensis	D1	getting out
2021-10-21 09:48:06	Pteronura brasiliensis	D1	getting out
2021-10-21 10:34:24	Pteronura brasiliensis	D1	getting in
2021-10-21 10:34:24	Pteronura brasiliensis	D1	getting in
2021-10-21 10:34:25	Pteronura brasiliensis	D1	getting in
2021-10-21 10:37:04	Pteronura brasiliensis	D1	getting out
2021-10-21 10:37:05	Pteronura brasiliensis	D1	getting out
2021-10-21 10:37:05	Pteronura brasiliensis	D1	getting out
2021-10-21 10:37:46	Pteronura brasiliensis	D1	getting in
2021-10-21 10:38:34	Pteronura brasiliensis	D1	getting out
2021-10-21 10:38:35	Pteronura brasiliensis	D1	getting out
2021-10-21 10:38:35	Pteronura brasiliensis	D1	getting out
2021-10-21 10:39:18	Pteronura brasiliensis	D1	getting in and out
2021-10-21 10:40:11	Pteronura brasiliensis	D1	getting out
2021-10-21 10:40:11	Pteronura brasiliensis	D1	getting out
2021-10-21 10:40:12	Pteronura brasiliensis	D1	getting out
2021-10-21 10:40:54	Pteronura brasiliensis	D1	getting in
2021-10-21 10:42:05	Pteronura brasiliensis	D1	getting in
2021-10-21 10:42:05	Pteronura brasiliensis	D1	getting in
2021-10-21 10:42:06	Pteronura brasiliensis	D1	getting in
2021-10-21 10:42:48	Pteronura brasiliensis	D1	getting in
2021-10-21 10:43:11	Pteronura brasiliensis	D1	getting in and out
2021-10-21 10:43:11	Pteronura brasiliensis	D1	getting in and out
2021-10-21 10:43:12	Pteronura brasiliensis	D1	getting in and out
2021-10-21 10:43:54	Pteronura brasiliensis	D1	getting in
2021-10-21 10:44:00	Pteronura brasiliensis	D1	getting in and out
2021-10-21 10:44:01	Pteronura brasiliensis	D1	getting in and out
2021-10-21 10:44:01	Pteronura brasiliensis	D1	getting in and out
2021-10-21 10:44:44	Pteronura brasiliensis	D1	getting in and out
2021-10-21 10:44:54	Pteronura brasiliensis	D1	getting out
2021-10-21 10:44:54	Pteronura brasiliensis	D1	getting out
2021-10-21 10:44:55	Pteronura brasiliensis	D1	getting out
2021-10-21 10:45:36	Pteronura brasiliensis	D1	getting in and out
2021-10-21 10:45:56	Pteronura brasiliensis	D1	getting in
2021-10-21 10:45:57	Pteronura brasiliensis	D1	getting in
2021-10-21 10:45:57	Pteronura brasiliensis	D1	getting in
2021-10-21 10:46:40	Pteronura brasiliensis	D1	getting out
2021-10-21 10:46:45	Pteronura brasiliensis	D1	getting in
2021-10-21 10:46:46	Pteronura brasiliensis	D1	getting in
2021-10-21 10:46:46	Pteronura brasiliensis	D1	getting in
2021-10-21 10:47:28	Pteronura brasiliensis	D1	getting in
2021-10-21 10:47:35	Pteronura brasiliensis	D1	getting out
2021-10-21 10:47:36	Pteronura brasiliensis	D1	getting out
2021-10-21 10:47:36	Pteronura brasiliensis	D1	getting out
2021-10-21 10:48:18	Pteronura brasiliensis	D1	getting in
2021-10-21 10:48:36	Pteronura brasiliensis	D1	getting in
2021-10-21 10:48:36	Pteronura brasiliensis	D1	getting in
2021-10-21 10:48:37	Pteronura brasiliensis	D1	getting in
2021-10-21 10:49:18	Pteronura brasiliensis	D1	getting out
2021-10-21 10:49:39	Pteronura brasiliensis	D1	getting out
2021-10-21 10:49:39	Pteronura brasiliensis	D1	getting out
2021-10-21 10:49:39	Pteronura brasiliensis	D1	getting out
2021-10-21 10:50:22	Pteronura brasiliensis	D1	getting in and out
2021-10-21 10:50:43	Pteronura brasiliensis	D1	getting out
2021-10-21 10:50:44	Pteronura brasiliensis	D1	getting out
2021-10-21 10:50:44	Pteronura brasiliensis	D1	getting out
2021-10-21 12:08:04	Pteronura brasiliensis	D1	getting in
2021-10-21 12:08:04	Pteronura brasiliensis	D1	getting in
2021-10-21 12:08:05	Pteronura brasiliensis	D1	getting in
2021-10-21 12:08:48	Pteronura brasiliensis	D1	getting in
2021-10-21 12:09:11	Pteronura brasiliensis	D1	getting in
2021-10-21 12:09:11	Pteronura brasiliensis	D1	getting in
2021-10-21 12:09:12	Pteronura brasiliensis	D1	getting in
2021-10-21 12:09:54	Pteronura brasiliensis	D1	getting in
2021-10-21 12:10:02	Pteronura brasiliensis	D1	getting in
2021-10-21 12:10:03	Pteronura brasiliensis	D1	getting in
2021-10-21 12:10:03	Pteronura brasiliensis	D1	getting in
2021-10-21 12:10:44	Pteronura brasiliensis	D1	getting in
2021-10-21 12:12:34	Pteronura brasiliensis	D1	getting out
2021-10-21 12:12:35	Pteronura brasiliensis	D1	getting out
2021-10-21 12:12:35	Pteronura brasiliensis	D1	getting out
2021-10-21 12:13:24	Pteronura brasiliensis	D1	getting out
2021-10-21 12:13:24	Pteronura brasiliensis	D1	getting out
2021-10-21 12:13:25	Pteronura brasiliensis	D1	getting out
2021-10-21 12:14:06	Pteronura brasiliensis	D1	getting out
2021-10-21 12:23:39	Pteronura brasiliensis	D1	getting in
2021-10-21 12:23:40	Pteronura brasiliensis	D1	getting in
2021-10-21 12:23:40	Pteronura brasiliensis	D1	getting in
2021-10-21 12:24:22	Pteronura brasiliensis	D1	getting in
2021-10-21 12:28:23	Pteronura brasiliensis	D1	getting in
2021-10-21 12:28:23	Pteronura brasiliensis	D1	getting in
2021-10-21 12:28:24	Pteronura brasiliensis	D1	getting in
2021-10-21 12:29:06	Pteronura brasiliensis	D1	getting in
2021-10-21 12:38:15	Pteronura brasiliensis	D1	getting in
2021-10-21 12:38:15	Pteronura brasiliensis	D1	getting in
2021-10-21 12:38:16	Pteronura brasiliensis	D1	getting in
2021-10-21 12:39:40	Pteronura brasiliensis	D1	getting in
2021-10-21 12:39:41	Pteronura brasiliensis	D1	getting in
2021-10-21 12:39:41	Pteronura brasiliensis	D1	getting in
2021-10-21 12:40:39	Pteronura brasiliensis	D1	getting in
2021-10-21 12:40:39	Pteronura brasiliensis	D1	getting in
2021-10-21 12:40:40	Pteronura brasiliensis	D1	getting in
2021-10-21 12:45:01	Pteronura brasiliensis	D1	getting in
2021-10-21 12:45:02	Pteronura brasiliensis	D1	getting in
2021-10-21 12:45:02	Pteronura brasiliensis	D1	getting in
2021-10-21 13:35:35	Pteronura brasiliensis	D1	getting out
2021-10-21 13:35:35	Pteronura brasiliensis	D1	getting out
2021-10-21 13:35:36	Pteronura brasiliensis	D1	getting out
2021-10-21 13:36:18	Pteronura brasiliensis	D1	getting out
2021-10-21 13:36:22	Pteronura brasiliensis	D1	getting out
2021-10-21 13:36:23	Pteronura brasiliensis	D1	getting out
2021-10-21 13:36:23	Pteronura brasiliensis	D1	getting out
2021-10-21 13:39:39	Pteronura brasiliensis	D1	getting in
2021-10-21 13:39:40	Pteronura brasiliensis	D1	getting in
2021-10-21 13:39:40	Pteronura brasiliensis	D1	getting in
2021-10-21 13:41:09	Pteronura brasiliensis	D1	getting out
2021-10-21 13:41:10	Pteronura brasiliensis	D1	getting out
2021-10-21 13:41:11	Pteronura brasiliensis	D1	getting out
2021-10-21 13:41:52	Pteronura brasiliensis	D1	getting out
2021-10-21 13:42:57	Pteronura brasiliensis	D1	getting out
2021-10-21 13:42:58	Pteronura brasiliensis	D1	getting out
2021-10-21 13:42:58	Pteronura brasiliensis	D1	getting out
2021-10-21 13:43:40	Pteronura brasiliensis	D1	getting in and out
2021-10-21 13:44:02	Pteronura brasiliensis	D1	getting in
2021-10-21 13:44:03	Pteronura brasiliensis	D1	getting in
2021-10-21 13:44:03	Pteronura brasiliensis	D1	getting in
2021-10-21 13:55:57	Pteronura brasiliensis	D1	getting in
2021-10-21 13:55:58	Pteronura brasiliensis	D1	getting in
2021-10-21 13:55:58	Pteronura brasiliensis	D1	getting in
2021-10-21 13:56:42	Pteronura brasiliensis	D1	getting in
2021-10-21 13:56:54	Pteronura brasiliensis	D1	getting out
2021-10-21 13:56:55	Pteronura brasiliensis	D1	getting out
2021-10-21 13:56:56	Pteronura brasiliensis	D1	getting out
2021-10-21 13:58:06	Pteronura brasiliensis	D1	getting in
2021-10-21 13:58:07	Pteronura brasiliensis	D1	getting in
2021-10-21 13:58:07	Pteronura brasiliensis	D1	getting in
2021-10-21 13:59:52	Pteronura brasiliensis	D1	getting out
2021-10-21 13:59:53	Pteronura brasiliensis	D1	getting out
2021-10-21 13:59:53	Pteronura brasiliensis	D1	getting out
2021-10-21 14:00:36	Pteronura brasiliensis	D1	getting in
2021-10-21 14:01:32	Pteronura brasiliensis	D1	getting out
2021-10-21 14:01:32	Pteronura brasiliensis	D1	getting out
2021-10-21 14:01:33	Pteronura brasiliensis	D1	getting out
2021-10-21 14:02:14	Pteronura brasiliensis	D1	getting in
2021-10-21 14:02:44	Pteronura brasiliensis	D1	getting out
2021-10-21 14:02:45	Pteronura brasiliensis	D1	getting out
2021-10-21 14:02:45	Pteronura brasiliensis	D1	getting out
2021-10-21 14:03:28	Pteronura brasiliensis	D1	getting out
2021-10-21 14:04:07	Pteronura brasiliensis	D1	getting in
2021-10-21 14:04:07	Pteronura brasiliensis	D1	getting in
2021-10-21 14:04:08	Pteronura brasiliensis	D1	getting in
2021-10-21 14:05:03	Pteronura brasiliensis	D1	getting in
2021-10-21 14:05:04	Pteronura brasiliensis	D1	getting in
2021-10-21 14:05:04	Pteronura brasiliensis	D1	getting in
2021-10-21 14:06:15	Pteronura brasiliensis	D1	getting out
2021-10-21 14:06:15	Pteronura brasiliensis	D1	getting out
2021-10-21 14:06:16	Pteronura brasiliensis	D1	getting out
2021-10-21 14:06:58	Pteronura brasiliensis	D1	getting in
2021-10-21 14:07:19	Pteronura brasiliensis	D1	getting out
2021-10-21 14:07:19	Pteronura brasiliensis	D1	getting out
2021-10-21 14:07:20	Pteronura brasiliensis	D1	getting out
2021-10-21 14:10:51	Pteronura brasiliensis	D1	getting in
2021-10-21 14:10:51	Pteronura brasiliensis	D1	getting in
2021-10-21 14:10:52	Pteronura brasiliensis	D1	getting in
2021-10-21 16:20:29	Pteronura brasiliensis	D1	getting in
2021-10-21 16:20:30	Pteronura brasiliensis	D1	getting in
2021-10-21 16:20:30	Pteronura brasiliensis	D1	getting in
2021-10-21 16:24:01	Pteronura brasiliensis	D1	getting in
2021-10-21 16:24:02	Pteronura brasiliensis	D1	getting in
2021-10-21 16:24:02	Pteronura brasiliensis	D1	getting in
2021-10-21 16:24:44	Pteronura brasiliensis	D1	getting in
2021-10-21 16:26:19	Pteronura brasiliensis	D1	getting in
2021-10-21 16:26:19	Pteronura brasiliensis	D1	getting in
2021-10-21 16:26:20	Pteronura brasiliensis	D1	getting in
2021-10-21 16:27:02	Pteronura brasiliensis	D1	getting in
2021-10-21 16:30:37	Pteronura brasiliensis	D1	getting out
2021-10-21 16:30:38	Pteronura brasiliensis	D1	getting out
2021-10-21 16:30:38	Pteronura brasiliensis	D1	getting out
2021-10-21 16:31:22	Pteronura brasiliensis	D1	getting in
2021-10-21 16:32:13	Pteronura brasiliensis	D1	getting in
2021-10-21 16:32:13	Pteronura brasiliensis	D1	getting in
2021-10-21 16:32:14	Pteronura brasiliensis	D1	getting in
2021-10-21 16:32:56	Pteronura brasiliensis	D1	getting in and out
2021-10-21 16:34:45	Pteronura brasiliensis	D1	getting in
2021-10-21 16:34:45	Pteronura brasiliensis	D1	getting in
2021-10-21 16:34:46	Pteronura brasiliensis	D1	getting in
2021-10-21 16:35:28	Pteronura brasiliensis	D1	getting in
2021-10-21 16:39:12	Pteronura brasiliensis	D1	getting out
2021-10-21 16:39:13	Pteronura brasiliensis	D1	getting out
2021-10-21 16:39:13	Pteronura brasiliensis	D1	getting out
2021-10-21 16:41:34	Pteronura brasiliensis	D1	getting in
2021-10-21 16:41:35	Pteronura brasiliensis	D1	getting in
2021-10-21 16:41:35	Pteronura brasiliensis	D1	getting in
2021-10-21 16:42:18	Pteronura brasiliensis	D1	getting in
2021-10-21 16:42:24	Pteronura brasiliensis	D1	getting in
2021-10-21 16:42:24	Pteronura brasiliensis	D1	getting in
2021-10-21 16:42:25	Pteronura brasiliensis	D1	getting in
2021-10-21 16:44:21	Pteronura brasiliensis	D1	getting in
2021-10-21 16:44:21	Pteronura brasiliensis	D1	getting in
2021-10-21 16:44:22	Pteronura brasiliensis	D1	getting in
2021-10-21 16:45:04	Pteronura brasiliensis	D1	getting in
2021-10-21 16:51:23	Pteronura brasiliensis	D1	getting in
2021-10-21 16:51:23	Pteronura brasiliensis	D1	getting in
2021-10-21 16:51:24	Pteronura brasiliensis	D1	getting in
2021-10-21 17:02:31	Pteronura brasiliensis	D1	getting in
2021-10-21 17:02:32	Pteronura brasiliensis	D1	getting in
2021-10-21 17:02:32	Pteronura brasiliensis	D1	getting in
2021-10-21 17:52:23	Pteronura brasiliensis	D1	getting out
2021-10-21 17:52:23	Pteronura brasiliensis	D1	getting out
2021-10-21 17:52:24	Pteronura brasiliensis	D1	getting out
2021-10-21 17:53:21	Pteronura brasiliensis	D1	getting out
2021-10-21 17:53:22	Pteronura brasiliensis	D1	getting out
2021-10-21 17:53:22	Pteronura brasiliensis	D1	getting out
2021-10-21 17:54:04	Pteronura brasiliensis	D1	getting out
2021-10-21 17:54:17	Pteronura brasiliensis	D1	getting out
2021-10-21 17:54:18	Pteronura brasiliensis	D1	getting out
2021-10-21 17:54:18	Pteronura brasiliensis	D1	getting out
2021-10-21 17:55:00	Pteronura brasiliensis	D1	getting out
2021-10-21 17:55:42	Pteronura brasiliensis	D1	getting out
2021-10-21 17:55:42	Pteronura brasiliensis	D1	getting out
2021-10-21 17:55:43	Pteronura brasiliensis	D1	getting out
2021-10-21 18:02:55	Pteronura brasiliensis	D1	getting in
2021-10-21 18:02:56	Pteronura brasiliensis	D1	getting in
2021-10-21 18:02:56	Pteronura brasiliensis	D1	getting in
2021-10-21 18:16:29	Pteronura brasiliensis	D1	getting in
2021-10-21 18:16:30	Pteronura brasiliensis	D1	getting in
2021-10-21 18:16:30	Pteronura brasiliensis	D1	getting in
2021-10-21 18:18:26	Pteronura brasiliensis	D1	getting in
2021-10-21 18:18:26	Pteronura brasiliensis	D1	getting in
2021-10-21 18:18:27	Pteronura brasiliensis	D1	getting in
2021-10-21 18:19:08	Pteronura brasiliensis	D1	getting in
2021-10-21 18:19:13	Pteronura brasiliensis	D1	getting in
2021-10-21 18:19:14	Pteronura brasiliensis	D1	getting in
2021-10-21 18:19:14	Pteronura brasiliensis	D1	getting in
2021-10-21 18:19:56	Pteronura brasiliensis	D1	getting in
2021-10-21 18:21:26	Pteronura brasiliensis	D1	getting in
2021-10-21 18:21:26	Pteronura brasiliensis	D1	getting in
2021-10-21 18:21:27	Pteronura brasiliensis	D1	getting in
2021-10-21 18:22:08	Pteronura brasiliensis	D1	getting in
2021-10-21 18:30:52	Pteronura brasiliensis	D1	getting in
2021-10-21 18:30:53	Pteronura brasiliensis	D1	getting in
2021-10-21 18:30:53	Pteronura brasiliensis	D1	getting in
2021-10-22 05:36:42	Pteronura brasiliensis	D1	getting out
2021-10-22 05:36:43	Pteronura brasiliensis	D1	getting out
2021-10-22 05:36:43	Pteronura brasiliensis	D1	getting out
2021-10-22 05:38:21	Pteronura brasiliensis	D1	getting out
2021-10-22 05:38:21	Pteronura brasiliensis	D1	getting out
2021-10-22 05:38:22	Pteronura brasiliensis	D1	getting out
2021-10-22 05:39:47	Pteronura brasiliensis	D1	getting out
2021-10-22 05:39:48	Pteronura brasiliensis	D1	getting out
2021-10-22 05:39:48	Pteronura brasiliensis	D1	getting out
2021-10-22 05:40:30	Pteronura brasiliensis	D1	getting out
2021-10-22 05:40:39	Pteronura brasiliensis	D1	getting out
2021-10-22 05:40:40	Pteronura brasiliensis	D1	getting out
2021-10-22 05:40:40	Pteronura brasiliensis	D1	getting out
2021-10-22 05:41:22	Pteronura brasiliensis	D1	getting in
2021-10-22 05:42:08	Pteronura brasiliensis	D1	getting out
2021-10-22 05:42:08	Pteronura brasiliensis	D1	getting out
2021-10-22 05:42:09	Pteronura brasiliensis	D1	getting out
2021-10-22 05:42:50	Pteronura brasiliensis	D1	getting in
2021-10-22 05:43:52	Pteronura brasiliensis	D1	getting out
2021-10-22 05:43:52	Pteronura brasiliensis	D1	getting out
2021-10-22 05:43:53	Pteronura brasiliensis	D1	getting out
2021-10-22 05:44:36	Pteronura brasiliensis	D1	getting out
2021-10-22 12:12:22	Pteronura brasiliensis	D1	getting in
2021-10-22 12:12:23	Pteronura brasiliensis	D1	getting in
2021-10-22 12:12:23	Pteronura brasiliensis	D1	getting in
2021-10-22 12:13:04	Pteronura brasiliensis	D1	getting in
2021-10-22 12:13:46	Pteronura brasiliensis	D1	getting out
2021-10-22 12:13:47	Pteronura brasiliensis	D1	getting out
2021-10-22 12:13:47	Pteronura brasiliensis	D1	getting out
2021-10-22 12:14:30	Pteronura brasiliensis	D1	getting out
2021-10-22 13:15:00	Pteronura brasiliensis	D1	getting in
2021-10-22 13:15:00	Pteronura brasiliensis	D1	getting in
2021-10-22 13:15:01	Pteronura brasiliensis	D1	getting in
2021-10-22 13:15:44	Pteronura brasiliensis	D1	getting out
2021-10-22 13:16:29	Pteronura brasiliensis	D1	getting in
2021-10-22 13:16:30	Pteronura brasiliensis	D1	getting in
2021-10-22 13:16:30	Pteronura brasiliensis	D1	getting in
2021-10-22 13:17:14	Pteronura brasiliensis	D1	getting in
2021-10-22 13:17:20	Pteronura brasiliensis	D1	getting in
2021-10-22 13:17:21	Pteronura brasiliensis	D1	getting in
2021-10-22 13:17:21	Pteronura brasiliensis	D1	getting in
2021-10-22 13:18:04	Pteronura brasiliensis	D1	getting in
2021-10-22 13:18:23	Pteronura brasiliensis	D1	getting out
2021-10-22 13:18:23	Pteronura brasiliensis	D1	getting out
2021-10-22 13:18:24	Pteronura brasiliensis	D1	getting out
2021-10-22 13:19:06	Pteronura brasiliensis	D1	getting in
2021-10-22 13:19:12	Pteronura brasiliensis	D1	getting in
2021-10-22 13:19:13	Pteronura brasiliensis	D1	getting in
2021-10-22 13:19:13	Pteronura brasiliensis	D1	getting in
2021-10-22 13:19:54	Pteronura brasiliensis	D1	getting in
2021-10-22 13:20:47	Pteronura brasiliensis	D1	getting in
2021-10-22 13:20:48	Pteronura brasiliensis	D1	getting in
2021-10-22 13:20:48	Pteronura brasiliensis	D1	getting in
2021-10-22 14:53:26	Pteronura brasiliensis	D1	getting out
2021-10-22 14:53:26	Pteronura brasiliensis	D1	getting out
2021-10-22 14:53:27	Pteronura brasiliensis	D1	getting out
2021-10-22 14:54:10	Pteronura brasiliensis	D1	getting out
2021-10-22 14:56:53	Pteronura brasiliensis	D1	getting out
2021-10-22 14:56:54	Pteronura brasiliensis	D1	getting out
2021-10-22 14:56:54	Pteronura brasiliensis	D1	getting out
2021-10-22 14:57:36	Pteronura brasiliensis	D1	getting out
2021-10-22 14:57:55	Pteronura brasiliensis	D1	getting out
2021-10-22 14:57:56	Pteronura brasiliensis	D1	getting out
2021-10-22 14:57:56	Pteronura brasiliensis	D1	getting out
2021-10-22 14:58:50	Pteronura brasiliensis	D1	getting out
2021-10-22 14:58:51	Pteronura brasiliensis	D1	getting out
2021-10-22 14:58:51	Pteronura brasiliensis	D1	getting out
2021-10-22 14:59:34	Pteronura brasiliensis	D1	getting in
2021-10-22 14:59:47	Pteronura brasiliensis	D1	getting in
2021-10-22 14:59:47	Pteronura brasiliensis	D1	getting in
2021-10-22 14:59:48	Pteronura brasiliensis	D1	getting in
2021-10-22 15:00:30	Pteronura brasiliensis	D1	getting in and out
2021-10-22 15:00:41	Pteronura brasiliensis	D1	getting in
2021-10-22 15:00:42	Pteronura brasiliensis	D1	getting in
2021-10-22 15:00:42	Pteronura brasiliensis	D1	getting in
2021-10-22 15:01:24	Pteronura brasiliensis	D1	getting out
2021-10-22 15:01:30	Pteronura brasiliensis	D1	getting in
2021-10-22 15:01:31	Pteronura brasiliensis	D1	getting in
2021-10-22 15:01:31	Pteronura brasiliensis	D1	getting in
2021-10-22 15:02:23	Pteronura brasiliensis	D1	getting out
2021-10-22 15:02:24	Pteronura brasiliensis	D1	getting out
2021-10-22 15:02:25	Pteronura brasiliensis	D1	getting out
2021-10-22 15:03:06	Pteronura brasiliensis	D1	getting in
2021-10-22 15:03:22	Pteronura brasiliensis	D1	getting out
2021-10-22 15:03:23	Pteronura brasiliensis	D1	getting out
2021-10-22 15:03:23	Pteronura brasiliensis	D1	getting out
2021-10-22 15:04:10	Pteronura brasiliensis	D1	getting in
2021-10-22 15:04:11	Pteronura brasiliensis	D1	getting in
2021-10-22 15:04:12	Pteronura brasiliensis	D1	getting in
2021-10-22 15:04:54	Pteronura brasiliensis	D1	getting in
2021-10-22 17:36:20	Pteronura brasiliensis	D1	getting in
2021-10-22 17:36:20	Pteronura brasiliensis	D1	getting in
2021-10-22 17:36:21	Pteronura brasiliensis	D1	getting in
2021-10-22 17:37:02	Pteronura brasiliensis	D1	getting in
2021-10-22 17:37:50	Pteronura brasiliensis	D1	getting in
2021-10-22 17:37:50	Pteronura brasiliensis	D1	getting in
2021-10-22 17:37:51	Pteronura brasiliensis	D1	getting in
2021-10-22 17:38:32	Pteronura brasiliensis	D1	getting out
2021-10-22 17:40:58	Pteronura brasiliensis	D1	getting out
2021-10-22 17:40:58	Pteronura brasiliensis	D1	getting out
2021-10-22 17:40:59	Pteronura brasiliensis	D1	getting out
2021-10-22 17:43:19	Pteronura brasiliensis	D1	getting in
2021-10-22 17:43:19	Pteronura brasiliensis	D1	getting in
2021-10-22 17:43:20	Pteronura brasiliensis	D1	getting in
2021-10-22 17:44:14	Pteronura brasiliensis	D1	getting in
2021-10-22 17:44:14	Pteronura brasiliensis	D1	getting in
2021-10-22 17:44:15	Pteronura brasiliensis	D1	getting in
2021-10-22 17:44:58	Pteronura brasiliensis	D1	getting in
2021-10-22 17:46:17	Pteronura brasiliensis	D1	getting out
2021-10-22 17:46:18	Pteronura brasiliensis	D1	getting out
2021-10-22 17:46:18	Pteronura brasiliensis	D1	getting out
2021-10-22 17:47:06	Pteronura brasiliensis	D1	getting in
2021-10-22 17:47:07	Pteronura brasiliensis	D1	getting in
2021-10-22 17:47:07	Pteronura brasiliensis	D1	getting in
2021-10-22 17:48:12	Pteronura brasiliensis	D1	getting in
2021-10-22 17:48:13	Pteronura brasiliensis	D1	getting in
2021-10-22 17:48:13	Pteronura brasiliensis	D1	getting in
2021-10-22 17:49:53	Pteronura brasiliensis	D1	getting in
2021-10-22 17:49:53	Pteronura brasiliensis	D1	getting in
2021-10-22 17:49:54	Pteronura brasiliensis	D1	getting in
2021-10-22 17:50:36	Pteronura brasiliensis	D1	getting in and out
2021-10-22 17:56:26	Pteronura brasiliensis	D1	getting in
2021-10-22 17:56:26	Pteronura brasiliensis	D1	getting in
2021-10-22 17:56:27	Pteronura brasiliensis	D1	getting in
2021-10-22 18:01:46	Pteronura brasiliensis	D1	getting in
2021-10-22 18:01:46	Pteronura brasiliensis	D1	getting in
2021-10-22 18:01:47	Pteronura brasiliensis	D1	getting in
2021-10-22 18:02:28	Pteronura brasiliensis	D1	getting in
2021-10-22 20:35:27	Pteronura brasiliensis	D1	getting in
2021-10-22 20:35:28	Pteronura brasiliensis	D1	getting in
2021-10-22 20:35:28	Pteronura brasiliensis	D1	getting in
2021-10-22 20:51:31	Pteronura brasiliensis	D1	getting out
2021-10-22 20:51:31	Pteronura brasiliensis	D1	getting out
2021-10-22 20:51:32	Pteronura brasiliensis	D1	getting out
2021-10-22 20:52:14	Pteronura brasiliensis	D1	getting out
2021-10-22 20:54:09	Pteronura brasiliensis	D1	getting out
2021-10-22 20:54:09	Pteronura brasiliensis	D1	getting out
2021-10-22 20:54:10	Pteronura brasiliensis	D1	getting out
2021-10-22 20:54:52	Pteronura brasiliensis	D1	getting out
2021-10-22 21:03:22	Pteronura brasiliensis	D1	getting in
2021-10-22 21:03:23	Pteronura brasiliensis	D1	getting in
2021-10-22 21:03:23	Pteronura brasiliensis	D1	getting in
2021-10-22 21:05:07	Pteronura brasiliensis	D1	getting in
2021-10-22 21:05:07	Pteronura brasiliensis	D1	getting in
2021-10-22 21:05:08	Pteronura brasiliensis	D1	getting in
2021-10-22 21:05:50	Pteronura brasiliensis	D1	getting in
2021-10-22 21:20:21	Pteronura brasiliensis	D1	getting in
2021-10-22 21:20:22	Pteronura brasiliensis	D1	getting in
2021-10-22 21:20:22	Pteronura brasiliensis	D1	getting in
2021-10-22 21:21:04	Pteronura brasiliensis	D1	getting in
2021-10-23 05:44:01	Pteronura brasiliensis	D1	getting out
2021-10-23 05:44:02	Pteronura brasiliensis	D1	getting out
2021-10-23 05:44:02	Pteronura brasiliensis	D1	getting out
2021-10-23 05:46:14	Pteronura brasiliensis	D1	getting out
2021-10-23 05:46:14	Pteronura brasiliensis	D1	getting out
2021-10-23 05:46:15	Pteronura brasiliensis	D1	getting out
2021-10-23 05:47:01	Pteronura brasiliensis	D1	getting out
2021-10-23 05:47:02	Pteronura brasiliensis	D1	getting out
2021-10-23 05:47:02	Pteronura brasiliensis	D1	getting out
2021-10-23 05:50:52	Pteronura brasiliensis	D1	getting out
2021-10-23 05:50:52	Pteronura brasiliensis	D1	getting out
2021-10-23 05:50:53	Pteronura brasiliensis	D1	getting out
2021-10-23 05:51:34	Pteronura brasiliensis	D1	getting out
2021-10-23 05:51:54	Pteronura brasiliensis	D1	getting in
2021-10-23 05:51:55	Pteronura brasiliensis	D1	getting in
2021-10-23 05:51:55	Pteronura brasiliensis	D1	getting in
2021-10-23 05:53:28	Pteronura brasiliensis	D1	getting out
2021-10-23 05:53:29	Pteronura brasiliensis	D1	getting out
2021-10-23 05:53:30	Pteronura brasiliensis	D1	getting out
2021-10-23 05:54:30	Pteronura brasiliensis	D1	getting in
2021-10-23 05:54:30	Pteronura brasiliensis	D1	getting in
2021-10-23 05:54:31	Pteronura brasiliensis	D1	getting in
2021-10-23 05:56:09	Pteronura brasiliensis	D1	getting out
2021-10-23 05:56:09	Pteronura brasiliensis	D1	getting out
2021-10-23 05:56:10	Pteronura brasiliensis	D1	getting out
2021-10-23 05:56:54	Pteronura brasiliensis	D1	getting in
2021-10-23 05:56:55	Pteronura brasiliensis	D1	getting in
2021-10-23 05:56:55	Pteronura brasiliensis	D1	getting in
2021-10-23 05:57:31	Pteronura brasiliensis	D1	getting in
2021-10-23 05:57:31	Pteronura brasiliensis	D1	getting in
2021-10-23 05:57:32	Pteronura brasiliensis	D1	getting in
2021-10-23 05:57:40	Pteronura brasiliensis	D1	getting out
2021-10-23 05:57:41	Pteronura brasiliensis	D1	getting out
2021-10-23 05:57:41	Pteronura brasiliensis	D1	getting out
2021-10-23 06:14:07	Pteronura brasiliensis	D1	getting in
2021-10-23 06:14:07	Pteronura brasiliensis	D1	getting in
2021-10-23 06:14:08	Pteronura brasiliensis	D1	getting in
2021-10-23 06:14:50	Pteronura brasiliensis	D1	getting in
2021-10-23 06:16:54	Pteronura brasiliensis	D1	getting out
2021-10-23 06:16:55	Pteronura brasiliensis	D1	getting out
2021-10-23 06:16:55	Pteronura brasiliensis	D1	getting out
2021-10-23 06:21:26	Pteronura brasiliensis	D1	getting in
2021-10-23 06:21:26	Pteronura brasiliensis	D1	getting in
2021-10-23 06:21:27	Pteronura brasiliensis	D1	getting in
2021-10-23 06:22:14	Pteronura brasiliensis	D1	getting out
2021-10-23 06:22:15	Pteronura brasiliensis	D1	getting out
2021-10-23 06:22:15	Pteronura brasiliensis	D1	getting out
2021-10-23 06:22:37	Pteronura brasiliensis	D1	getting out
2021-10-23 06:22:37	Pteronura brasiliensis	D1	getting out
2021-10-23 06:22:38	Pteronura brasiliensis	D1	getting out
2021-10-23 19:12:47	Pteronura brasiliensis	D1	getting in
2021-10-23 19:12:48	Pteronura brasiliensis	D1	getting in
2021-10-23 19:12:48	Pteronura brasiliensis	D1	getting in
2021-10-24 06:03:16	Pteronura brasiliensis	D1	getting out
2021-10-24 06:03:16	Pteronura brasiliensis	D1	getting out
2021-10-24 06:03:17	Pteronura brasiliensis	D1	getting out
2021-10-24 06:03:57	Pteronura brasiliensis	D1	getting out
2021-10-24 06:03:59	Pteronura brasiliensis	D1	getting out
2021-10-24 06:03:59	Pteronura brasiliensis	D1	getting out
2021-10-24 06:04:55	Pteronura brasiliensis	D1	getting out
2021-10-24 06:04:55	Pteronura brasiliensis	D1	getting out
2021-10-24 06:04:56	Pteronura brasiliensis	D1	getting out
2021-10-24 06:06:20	Pteronura brasiliensis	D1	getting out
2021-10-24 06:06:21	Pteronura brasiliensis	D1	getting out
2021-10-24 06:06:21	Pteronura brasiliensis	D1	getting out
2021-10-24 06:06:48	Pteronura brasiliensis	D1	getting out
2021-10-24 06:06:49	Pteronura brasiliensis	D1	getting out
2021-10-24 06:06:49	Pteronura brasiliensis	D1	getting out
2021-10-24 06:07:07	Pteronura brasiliensis	D1	getting in
2021-10-24 06:07:07	Pteronura brasiliensis	D1	getting in
2021-10-24 06:07:08	Pteronura brasiliensis	D1	getting in
2021-10-24 09:15:07	Pteronura brasiliensis	D1	getting in
2021-10-24 09:15:07	Pteronura brasiliensis	D1	getting in
2021-10-24 09:15:08	Pteronura brasiliensis	D1	getting in
2021-10-24 09:15:50	Pteronura brasiliensis	D1	getting in
2021-10-24 09:16:38	Pteronura brasiliensis	D1	getting in
2021-10-24 09:16:39	Pteronura brasiliensis	D1	getting in
2021-10-24 09:16:39	Pteronura brasiliensis	D1	getting in
2021-10-24 09:17:20	Pteronura brasiliensis	D1	getting in
2021-10-24 09:18:21	Pteronura brasiliensis	D1	getting out
2021-10-24 09:18:22	Pteronura brasiliensis	D1	getting out
2021-10-24 09:18:22	Pteronura brasiliensis	D1	getting out
2021-10-24 09:19:58	Pteronura brasiliensis	D1	getting out
2021-10-24 09:19:58	Pteronura brasiliensis	D1	getting out
2021-10-24 09:19:59	Pteronura brasiliensis	D1	getting out
2021-10-24 09:20:52	Pteronura brasiliensis	D1	getting out
2021-10-24 09:20:53	Pteronura brasiliensis	D1	getting out
2021-10-24 09:20:53	Pteronura brasiliensis	D1	getting out
2021-10-24 09:21:36	Pteronura brasiliensis	D1	getting out
2021-10-24 09:22:00	Pteronura brasiliensis	D1	getting in
2021-10-24 09:22:00	Pteronura brasiliensis	D1	getting in
2021-10-24 09:22:01	Pteronura brasiliensis	D1	getting in
2021-10-24 09:22:44	Pteronura brasiliensis	D1	getting in
2021-11-01 12:21:48	Pteronura brasiliensis	D1	getting in
2021-11-01 12:21:48	Pteronura brasiliensis	D1	getting in
2021-11-01 12:21:49	Pteronura brasiliensis	D1	getting in
2021-11-01 12:22:30	Pteronura brasiliensis	D1	getting in
2021-11-01 13:22:50	Pteronura brasiliensis	D1	getting out
2021-11-01 13:22:51	Pteronura brasiliensis	D1	getting out
2021-11-01 13:22:51	Pteronura brasiliensis	D1	getting out
2021-11-01 13:23:34	Pteronura brasiliensis	D1	getting out
2021-11-01 13:26:16	Pteronura brasiliensis	D1	getting out
2021-11-01 13:26:17	Pteronura brasiliensis	D1	getting out
2021-11-01 13:26:17	Pteronura brasiliensis	D1	getting out
2021-11-01 13:26:58	Pteronura brasiliensis	D1	getting out
2021-11-01 13:27:06	Pteronura brasiliensis	D1	getting out
2021-11-01 13:27:06	Pteronura brasiliensis	D1	getting out
2021-11-01 13:27:07	Pteronura brasiliensis	D1	getting out
2021-11-01 13:31:07	Pteronura brasiliensis	D1	getting in
2021-11-01 13:31:07	Pteronura brasiliensis	D1	getting in
2021-11-01 13:31:08	Pteronura brasiliensis	D1	getting in
2021-11-01 13:31:50	Pteronura brasiliensis	D1	getting in
2021-11-01 13:36:08	Pteronura brasiliensis	D1	getting out
2021-11-01 13:36:08	Pteronura brasiliensis	D1	getting out
2021-11-01 13:36:09	Pteronura brasiliensis	D1	getting out
2021-11-01 13:36:50	Pteronura brasiliensis	D1	getting out
2021-11-01 17:41:48	Pteronura brasiliensis	D1	getting in
2021-11-01 17:41:48	Pteronura brasiliensis	D1	getting in
2021-11-01 17:41:48	Pteronura brasiliensis	D1	getting in
2021-11-01 17:42:11	Pteronura brasiliensis	D1	getting in
2021-11-01 17:42:12	Pteronura brasiliensis	D1	getting in
2021-11-01 17:42:12	Pteronura brasiliensis	D1	getting in
2021-11-01 17:42:18	Pteronura brasiliensis	D1	getting in
2021-11-01 17:42:18	Pteronura brasiliensis	D1	getting in
2021-11-01 17:42:18	Pteronura brasiliensis	D1	getting in
2021-11-01 17:42:28	Pteronura brasiliensis	D1	getting in
2021-11-01 17:42:28	Pteronura brasiliensis	D1	getting in
2021-11-01 17:42:29	Pteronura brasiliensis	D1	getting in
2021-11-02 11:59:41	Pteronura brasiliensis	D1	getting in
2021-11-02 11:59:41	Pteronura brasiliensis	D1	getting in
2021-11-02 11:59:42	Pteronura brasiliensis	D1	getting in
2021-11-02 12:00:54	Pteronura brasiliensis	D1	getting out
2021-11-02 12:00:55	Pteronura brasiliensis	D1	getting out
2021-11-02 12:00:55	Pteronura brasiliensis	D1	getting out
2021-11-02 12:01:38	Pteronura brasiliensis	D1	getting out
2021-11-02 12:05:32	Pteronura brasiliensis	D1	getting in
2021-11-02 12:05:32	Pteronura brasiliensis	D1	getting in
2021-11-02 12:05:33	Pteronura brasiliensis	D1	getting in
2021-11-02 12:06:14	Pteronura brasiliensis	D1	getting in
2021-11-02 12:15:58	Pteronura brasiliensis	D1	getting in
2021-11-02 12:15:59	Pteronura brasiliensis	D1	getting in
2021-11-02 12:15:59	Pteronura brasiliensis	D1	getting in
2021-11-02 12:17:55	Pteronura brasiliensis	D1	getting in
2021-11-02 12:17:55	Pteronura brasiliensis	D1	getting in
2021-11-02 12:17:56	Pteronura brasiliensis	D1	getting in
2021-11-02 12:18:36	Pteronura brasiliensis	D1	getting in
2021-11-02 12:19:58	Pteronura brasiliensis	D1	getting in
2021-11-02 12:19:58	Pteronura brasiliensis	D1	getting in
2021-11-02 12:19:59	Pteronura brasiliensis	D1	getting in
2021-11-02 12:20:40	Pteronura brasiliensis	D1	getting in
2021-11-02 12:22:43	Pteronura brasiliensis	D1	getting out
2021-11-02 12:22:44	Pteronura brasiliensis	D1	getting out
2021-11-02 12:22:44	Pteronura brasiliensis	D1	getting out
2021-11-02 12:23:26	Pteronura brasiliensis	D1	getting in
2021-11-02 12:28:55	Pteronura brasiliensis	D1	getting in
2021-11-02 12:28:55	Pteronura brasiliensis	D1	getting in
2021-11-02 12:28:56	Pteronura brasiliensis	D1	getting in
2021-11-02 12:29:36	Pteronura brasiliensis	D1	getting in
2021-11-02 13:35:36	Pteronura brasiliensis	D1	getting out
2021-11-02 13:35:37	Pteronura brasiliensis	D1	getting out
2021-11-02 13:35:37	Pteronura brasiliensis	D1	getting out
2021-11-02 13:38:37	Pteronura brasiliensis	D1	getting out
2021-11-02 13:38:37	Pteronura brasiliensis	D1	getting out
2021-11-02 13:38:38	Pteronura brasiliensis	D1	getting out
2021-11-02 13:40:00	Pteronura brasiliensis	D1	getting out
2021-11-02 13:40:00	Pteronura brasiliensis	D1	getting out
2021-11-02 13:40:01	Pteronura brasiliensis	D1	getting out
2021-11-02 13:40:57	Pteronura brasiliensis	D1	getting out
2021-11-02 13:40:57	Pteronura brasiliensis	D1	getting out
2021-11-02 13:40:58	Pteronura brasiliensis	D1	getting out
2021-11-02 13:41:40	Pteronura brasiliensis	D1	getting out
2021-11-02 13:46:25	Pteronura brasiliensis	D1	getting in
2021-11-02 13:46:26	Pteronura brasiliensis	D1	getting in
2021-11-02 13:46:26	Pteronura brasiliensis	D1	getting in
2021-11-02 13:47:08	Pteronura brasiliensis	D1	getting in
2021-11-02 13:47:59	Pteronura brasiliensis	D1	getting out
2021-11-02 13:47:59	Pteronura brasiliensis	D1	getting out
2021-11-02 13:47:59	Pteronura brasiliensis	D1	getting out
2021-11-02 13:48:40	Pteronura brasiliensis	D1	getting in
2021-11-02 13:49:19	Pteronura brasiliensis	D1	getting out
2021-11-02 13:49:20	Pteronura brasiliensis	D1	getting out
2021-11-02 13:49:20	Pteronura brasiliensis	D1	getting out
2021-11-02 13:51:13	Pteronura brasiliensis	D1	getting in
2021-11-02 13:51:14	Pteronura brasiliensis	D1	getting in
2021-11-02 13:51:14	Pteronura brasiliensis	D1	getting in
2021-11-02 13:51:56	Pteronura brasiliensis	D1	getting out
2021-11-02 16:49:44	Pteronura brasiliensis	D1	getting in
2021-11-02 16:49:45	Pteronura brasiliensis	D1	getting in
2021-11-02 16:49:45	Pteronura brasiliensis	D1	getting in
2021-11-02 16:51:34	Pteronura brasiliensis	D1	getting out
2021-11-02 16:51:34	Pteronura brasiliensis	D1	getting out
2021-11-02 16:51:35	Pteronura brasiliensis	D1	getting out
2021-11-02 16:52:18	Pteronura brasiliensis	D1	getting in
2021-11-02 16:52:19	Pteronura brasiliensis	D1	getting in
2021-11-02 16:52:19	Pteronura brasiliensis	D1	getting in
2021-11-02 16:53:06	Pteronura brasiliensis	D1	getting in
2021-11-02 16:53:06	Pteronura brasiliensis	D1	getting in
2021-11-02 16:53:07	Pteronura brasiliensis	D1	getting in
2021-11-02 16:53:11	Pteronura brasiliensis	D1	getting in
2021-11-02 16:53:11	Pteronura brasiliensis	D1	getting in
2021-11-02 16:53:12	Pteronura brasiliensis	D1	getting in
2021-11-02 16:53:48	Pteronura brasiliensis	D1	getting in
2021-11-02 16:53:48	Pteronura brasiliensis	D1	getting in
2021-11-02 16:53:48	Pteronura brasiliensis	D1	getting in
2021-11-02 16:55:33	Pteronura brasiliensis	D1	getting in
2021-11-02 16:55:34	Pteronura brasiliensis	D1	getting in
2021-11-02 16:55:34	Pteronura brasiliensis	D1	getting in
2021-11-02 16:55:38	Pteronura brasiliensis	D1	getting in
2021-11-02 16:55:38	Pteronura brasiliensis	D1	getting in
2021-11-02 16:55:39	Pteronura brasiliensis	D1	getting in
2021-11-02 16:55:42	Pteronura brasiliensis	D1	getting in
2021-11-02 16:55:43	Pteronura brasiliensis	D1	getting in
2021-11-02 16:55:43	Pteronura brasiliensis	D1	getting in
2021-11-03 05:58:43	Pteronura brasiliensis	D1	getting out
2021-11-03 05:58:43	Pteronura brasiliensis	D1	getting out
2021-11-03 05:58:43	Pteronura brasiliensis	D1	getting out
2021-11-03 06:00:20	Pteronura brasiliensis	D1	getting out
2021-11-03 06:00:20	Pteronura brasiliensis	D1	getting out
2021-11-03 06:00:21	Pteronura brasiliensis	D1	getting out
2021-11-03 06:00:59	Pteronura brasiliensis	D1	getting out
2021-11-03 06:00:59	Pteronura brasiliensis	D1	getting out
2021-11-03 06:01:00	Pteronura brasiliensis	D1	getting out
2021-11-03 06:01:17	Pteronura brasiliensis	D1	getting out
2021-11-03 06:01:17	Pteronura brasiliensis	D1	getting out
2021-11-03 06:01:17	Pteronura brasiliensis	D1	getting out
2021-11-03 06:01:48	Pteronura brasiliensis	D1	getting out
2021-11-03 06:01:49	Pteronura brasiliensis	D1	getting out
2021-11-03 06:01:49	Pteronura brasiliensis	D1	getting out
2021-11-03 06:01:53	Pteronura brasiliensis	D1	getting out
2021-11-03 06:01:54	Pteronura brasiliensis	D1	getting out
2021-11-03 06:01:54	Pteronura brasiliensis	D1	getting out
2021-11-03 06:02:05	Pteronura brasiliensis	D1	getting out
2021-11-03 06:02:05	Pteronura brasiliensis	D1	getting out
2021-11-03 06:02:06	Pteronura brasiliensis	D1	getting out
2021-09-17 09:41:29	Pteronura brasiliensis	D2	getting in
2021-09-17 09:41:30	Pteronura brasiliensis	D2	getting in
2021-09-17 09:41:30	Pteronura brasiliensis	D2	getting in
2021-09-17 09:42:12	Pteronura brasiliensis	D2	getting in and out
2021-09-17 09:42:51	Pteronura brasiliensis	D2	getting out
2021-09-17 09:42:52	Pteronura brasiliensis	D2	getting out
2021-09-17 09:42:52	Pteronura brasiliensis	D2	getting out
2021-09-17 09:43:34	Pteronura brasiliensis	D2	getting in and out
2021-09-17 09:44:48	Pteronura brasiliensis	D2	getting out
2021-09-17 09:44:49	Pteronura brasiliensis	D2	getting out
2021-09-17 09:44:49	Pteronura brasiliensis	D2	getting out
2021-09-17 09:45:32	Pteronura brasiliensis	D2	getting out
2021-09-17 09:45:46	Pteronura brasiliensis	D2	getting out
2021-09-17 09:45:46	Pteronura brasiliensis	D2	getting out
2021-09-17 09:45:47	Pteronura brasiliensis	D2	getting out
2021-09-17 09:46:28	Pteronura brasiliensis	D2	getting in and out
2021-09-17 09:51:26	Pteronura brasiliensis	D2	getting in
2021-09-17 09:51:47	Pteronura brasiliensis	D2	getting out
2021-09-17 09:51:47	Pteronura brasiliensis	D2	getting out
2021-09-17 09:51:48	Pteronura brasiliensis	D2	getting out
2021-09-17 09:52:28	Pteronura brasiliensis	D2	getting in
2021-09-17 09:54:36	Pteronura brasiliensis	D2	getting in and out
2021-09-17 09:55:32	Pteronura brasiliensis	D2	getting in
2021-09-17 09:55:32	Pteronura brasiliensis	D2	getting in
2021-09-17 09:55:33	Pteronura brasiliensis	D2	getting in
2021-09-17 09:56:14	Pteronura brasiliensis	D2	getting out
2021-09-17 09:57:04	Pteronura brasiliensis	D2	getting in
2021-09-17 09:57:05	Pteronura brasiliensis	D2	getting in
2021-09-17 09:57:05	Pteronura brasiliensis	D2	getting in
2021-09-17 09:57:46	Pteronura brasiliensis	D2	getting in
2021-09-18 13:32:14	Pteronura brasiliensis	D2	getting out
2021-09-18 13:32:14	Pteronura brasiliensis	D2	getting out
2021-09-18 13:32:15	Pteronura brasiliensis	D2	getting out
2021-09-18 13:32:56	Pteronura brasiliensis	D2	getting out
2021-09-18 15:21:25	Pteronura brasiliensis	D2	getting out
2021-09-18 15:21:25	Pteronura brasiliensis	D2	getting out
2021-09-18 15:21:26	Pteronura brasiliensis	D2	getting out
2021-09-18 15:22:08	Pteronura brasiliensis	D2	getting in
2021-09-18 15:23:24	Pteronura brasiliensis	D2	getting out
2021-09-18 15:23:25	Pteronura brasiliensis	D2	getting out
2021-09-18 15:23:25	Pteronura brasiliensis	D2	getting out
2021-09-18 15:24:06	Pteronura brasiliensis	D2	getting out
2021-09-18 15:25:19	Pteronura brasiliensis	D2	getting out
2021-09-18 15:25:19	Pteronura brasiliensis	D2	getting out
2021-09-18 15:25:20	Pteronura brasiliensis	D2	getting out
2021-09-18 15:26:00	Pteronura brasiliensis	D2	getting in
2021-09-27 20:27:00	Pteronura brasiliensis	D2	in front
2021-09-27 20:27:00	Pteronura brasiliensis	D2	in front
2021-09-27 20:27:00	Pteronura brasiliensis	D2	in front
2021-10-16 07:47:40	Pteronura brasiliensis	D2	getting in
2021-10-16 07:47:41	Pteronura brasiliensis	D2	getting in
2021-10-16 07:47:41	Pteronura brasiliensis	D2	getting in
2021-10-16 07:48:24	Pteronura brasiliensis	D2	in front
2021-08-18 12:26:31	Lontra longicaudis	D3	getting out
2021-08-18 12:26:32	Lontra longicaudis	D3	getting out
2021-08-18 12:26:32	Lontra longicaudis	D3	getting out
2021-08-19 14:47:51	Lontra longicaudis	D3	getting out
2021-08-19 14:47:51	Lontra longicaudis	D3	getting out
2021-08-19 14:47:51	Lontra longicaudis	D3	getting out
2021-08-25 08:32:40	Lontra longicaudis	D3	getting in
2021-08-25 08:32:41	Lontra longicaudis	D3	getting in
2021-08-25 08:32:41	Lontra longicaudis	D3	getting in
2021-08-25 08:33:22	Lontra longicaudis	D3	getting out
2021-08-25 14:17:09	Lontra longicaudis	D3	getting out
2021-08-25 14:17:09	Lontra longicaudis	D3	getting out
2021-08-25 14:17:09	Lontra longicaudis	D3	getting out
2021-08-25 14:57:10	Lontra longicaudis	D3	getting out
2021-08-25 14:57:10	Lontra longicaudis	D3	getting out
2021-08-25 14:57:11	Lontra longicaudis	D3	getting out
2021-08-27 09:51:00	Lontra longicaudis	D3	getting in
2021-08-27 09:51:00	Lontra longicaudis	D3	getting in
2021-08-27 09:51:01	Lontra longicaudis	D3	getting in
2021-08-27 09:51:44	Lontra longicaudis	D3	getting out
2021-08-27 10:25:12	Lontra longicaudis	D3	getting out
2021-08-27 10:25:12	Lontra longicaudis	D3	getting out
2021-08-27 10:25:13	Lontra longicaudis	D3	getting out
2021-08-27 10:54:49	Lontra longicaudis	D3	getting out
2021-08-27 10:54:50	Lontra longicaudis	D3	getting out
2021-08-27 10:54:50	Lontra longicaudis	D3	getting out
2021-08-27 12:31:51	Lontra longicaudis	D3	getting out
2021-08-27 12:31:52	Lontra longicaudis	D3	getting out
2021-08-27 12:31:52	Lontra longicaudis	D3	getting out
2021-08-27 12:32:34	Lontra longicaudis	D3	getting in and out
2021-08-31 08:26:49	Lontra longicaudis	D3	getting out
2021-08-31 08:26:50	Lontra longicaudis	D3	getting out
2021-08-31 08:26:50	Lontra longicaudis	D3	getting out
2021-09-02 16:35:10	Lontra longicaudis	D3	getting in and out
2021-09-16 07:21:18	Lontra longicaudis	D3	getting in
2021-09-16 07:21:19	Lontra longicaudis	D3	getting in
2021-09-16 07:21:19	Lontra longicaudis	D3	getting in
2021-09-16 07:22:02	Lontra longicaudis	D3	getting in and out
2021-09-18 08:07:17	Lontra longicaudis	D3	getting in
2021-09-18 08:07:18	Lontra longicaudis	D3	getting in
2021-09-18 08:07:18	Lontra longicaudis	D3	getting in
2021-09-18 08:08:00	Lontra longicaudis	D3	getting in and out
2021-09-20 08:29:01	Lontra longicaudis	D3	getting out
2021-09-20 08:29:01	Lontra longicaudis	D3	getting out
2021-09-20 08:29:02	Lontra longicaudis	D3	getting out
2021-10-18 07:04:47	Lontra longicaudis	D3	getting in
2021-10-18 07:04:47	Lontra longicaudis	D3	getting in
2021-10-18 07:04:48	Lontra longicaudis	D3	getting in
2021-10-18 07:05:30	Lontra longicaudis	D3	getting in and out
2021-10-23 16:45:15	Lontra longicaudis	D3	getting in
2021-10-23 16:45:15	Lontra longicaudis	D3	getting in
2021-10-23 16:45:15	Lontra longicaudis	D3	getting in
2021-10-23 16:45:56	Lontra longicaudis	D3	getting in and out
2021-08-24 08:23:20	Lontra longicaudis	D4	getting in
2021-08-24 08:23:21	Lontra longicaudis	D4	getting in
2021-08-24 08:23:21	Lontra longicaudis	D4	getting in
2021-08-24 08:23:57	Lontra longicaudis	D4	getting out
2021-08-25 08:02:15	Lontra longicaudis	D4	getting in
2021-08-25 08:02:15	Lontra longicaudis	D4	getting in
2021-08-25 08:02:16	Lontra longicaudis	D4	getting in
2021-08-25 08:02:37	Lontra longicaudis	D4	getting in
2021-08-25 08:02:37	Lontra longicaudis	D4	getting in
2021-08-25 08:02:37	Lontra longicaudis	D4	getting in
2021-08-25 08:02:56	Lontra longicaudis	D4	getting out
2021-08-25 08:02:57	Lontra longicaudis	D4	getting out
2021-08-25 08:02:57	Lontra longicaudis	D4	getting out
2021-08-25 09:39:55	Lontra longicaudis	D4	getting out
2021-08-25 09:39:55	Lontra longicaudis	D4	getting out
2021-08-25 09:39:56	Lontra longicaudis	D4	getting out
2021-08-25 09:40:50	Lontra longicaudis	D4	getting out
2021-08-25 09:40:51	Lontra longicaudis	D4	getting out
2021-08-25 09:40:51	Lontra longicaudis	D4	getting out
2021-08-25 10:00:16	Lontra longicaudis	D4	getting out
2021-08-25 10:00:16	Lontra longicaudis	D4	getting out
2021-08-25 10:00:16	Lontra longicaudis	D4	getting out
2021-08-25 13:17:57	Lontra longicaudis	D4	getting in
2021-08-25 13:17:57	Lontra longicaudis	D4	getting in
2021-08-25 13:17:57	Lontra longicaudis	D4	getting in
2021-08-25 13:18:39	Lontra longicaudis	D4	getting out
2021-08-25 13:18:40	Lontra longicaudis	D4	getting out
2021-08-25 13:18:40	Lontra longicaudis	D4	getting out
2021-08-25 13:27:01	Lontra longicaudis	D4	getting in
2021-08-25 13:27:01	Lontra longicaudis	D4	getting in
2021-08-25 13:27:02	Lontra longicaudis	D4	getting in
2021-08-25 13:45:17	Lontra longicaudis	D4	getting out
2021-08-25 13:45:17	Lontra longicaudis	D4	getting out
2021-08-25 13:45:17	Lontra longicaudis	D4	getting out
2021-08-25 15:57:30	Lontra longicaudis	D4	getting in
2021-08-25 15:57:30	Lontra longicaudis	D4	getting in
2021-08-25 15:57:31	Lontra longicaudis	D4	getting in
2021-08-25 15:58:05	Lontra longicaudis	D4	getting in
2021-08-25 15:58:05	Lontra longicaudis	D4	getting in
2021-08-25 15:58:05	Lontra longicaudis	D4	getting in
2021-08-25 15:58:42	Lontra longicaudis	D4	getting out
2021-08-25 15:58:42	Lontra longicaudis	D4	getting out
2021-08-26 07:32:21	Lontra longicaudis	D4	getting out
2021-08-26 07:32:21	Lontra longicaudis	D4	getting out
2021-08-26 07:32:21	Lontra longicaudis	D4	getting out
2021-08-26 10:42:25	Lontra longicaudis	D4	getting in
2021-08-26 10:42:25	Lontra longicaudis	D4	getting in
2021-08-26 10:42:26	Lontra longicaudis	D4	getting in
2021-08-26 11:24:37	Lontra longicaudis	D4	getting out
2021-08-26 11:24:37	Lontra longicaudis	D4	getting out
2021-08-26 11:24:37	Lontra longicaudis	D4	getting out
2021-08-27 09:27:57	Lontra longicaudis	D4	getting out
2021-09-01 12:12:57	Lontra longicaudis	D4	getting in
2021-09-01 12:12:57	Lontra longicaudis	D4	getting in
2021-09-01 12:12:57	Lontra longicaudis	D4	getting in
2021-09-01 12:13:52	Lontra longicaudis	D4	getting out
2021-09-03 13:18:56	Pteronura brasiliensis	D4	getting in
2021-09-03 13:18:56	Pteronura brasiliensis	D4	getting in
2021-09-03 13:18:57	Pteronura brasiliensis	D4	getting in
2021-09-03 13:19:07	Pteronura brasiliensis	D4	getting out
2021-09-03 13:19:07	Pteronura brasiliensis	D4	getting out
2021-09-03 13:19:08	Pteronura brasiliensis	D4	getting out
2021-09-04 12:57:25	Lontra longicaudis	D4	getting out
2021-09-04 12:57:26	Lontra longicaudis	D4	getting out
2021-09-04 12:57:26	Lontra longicaudis	D4	getting out
2021-09-04 13:44:53	Lontra longicaudis	D4	getting in
2021-09-04 13:44:53	Lontra longicaudis	D4	getting in
2021-09-04 13:44:54	Lontra longicaudis	D4	getting in
2021-09-08 16:05:53	Lontra longicaudis	D4	getting in
2021-09-08 16:05:53	Lontra longicaudis	D4	getting in
2021-09-08 16:05:54	Lontra longicaudis	D4	getting in
2021-09-10 11:50:14	Lontra longicaudis	D4	getting in
2021-09-10 11:50:14	Lontra longicaudis	D4	getting in
2021-09-10 11:50:14	Lontra longicaudis	D4	getting in
2021-09-11 10:00:12	Lontra longicaudis	D4	getting in and out
2021-09-11 10:00:12	Lontra longicaudis	D4	getting in and out
2021-09-11 10:00:13	Lontra longicaudis	D4	getting in and out
2021-09-13 08:31:28	Lontra longicaudis	D4	getting in
2021-09-13 08:31:29	Lontra longicaudis	D4	getting in
2021-09-13 08:31:29	Lontra longicaudis	D4	getting in
2021-09-13 08:32:20	Lontra longicaudis	D4	getting out
2021-09-15 14:56:20	Lontra longicaudis	D4	getting in
2021-09-16 08:21:05	Lontra longicaudis	D4	getting in
2021-09-16 08:21:05	Lontra longicaudis	D4	getting in
2021-09-16 08:21:05	Lontra longicaudis	D4	getting in
2021-09-16 08:21:16	Lontra longicaudis	D4	getting in
2021-09-16 08:21:16	Lontra longicaudis	D4	getting in
2021-09-16 08:21:17	Lontra longicaudis	D4	getting in
2021-09-21 11:51:35	Lontra longicaudis	D4	getting in
2021-09-21 11:51:35	Lontra longicaudis	D4	getting in
2021-09-21 11:51:36	Lontra longicaudis	D4	getting in
2021-09-21 11:52:47	Lontra longicaudis	D4	getting in
2021-09-21 11:52:47	Lontra longicaudis	D4	getting in
2021-09-21 11:52:47	Lontra longicaudis	D4	getting in
2021-09-24 07:32:37	Lontra longicaudis	D4	getting in
2021-09-24 07:32:37	Lontra longicaudis	D4	getting in
2021-09-24 07:32:38	Lontra longicaudis	D4	getting in
2021-09-24 07:32:52	Lontra longicaudis	D4	getting in
2021-09-24 07:32:52	Lontra longicaudis	D4	getting in
2021-09-24 07:33:24	Lontra longicaudis	D4	getting out
2021-09-24 07:33:24	Lontra longicaudis	D4	getting out
2021-09-24 07:33:24	Lontra longicaudis	D4	getting out
2021-09-24 07:33:35	Lontra longicaudis	D4	getting out
2021-09-26 15:27:41	Lontra longicaudis	D4	getting out
2021-09-26 15:27:41	Lontra longicaudis	D4	getting out
2021-09-26 15:27:41	Lontra longicaudis	D4	getting out
2021-09-26 15:28:15	Lontra longicaudis	D4	getting in
2021-09-26 15:28:15	Lontra longicaudis	D4	getting in
2021-09-26 15:28:16	Lontra longicaudis	D4	getting in
2021-09-28 13:41:02	Lontra longicaudis	D4	getting in
2021-09-28 13:41:02	Lontra longicaudis	D4	getting in
2021-09-28 13:41:03	Lontra longicaudis	D4	getting in
2021-09-29 08:57:53	Lontra longicaudis	D4	getting in
2021-09-29 08:57:53	Lontra longicaudis	D4	getting in
2021-09-29 08:57:54	Lontra longicaudis	D4	getting in
2021-10-03 10:32:16	Pteronura brasiliensis	D4	getting in
2021-10-03 10:32:16	Pteronura brasiliensis	D4	getting in
2021-10-03 10:32:16	Pteronura brasiliensis	D4	getting in
2021-10-03 10:32:38	Pteronura brasiliensis	D4	getting out
2021-10-03 10:32:39	Pteronura brasiliensis	D4	getting out
2021-10-03 10:32:39	Pteronura brasiliensis	D4	getting out
2021-10-03 17:04:51	Lontra longicaudis	D4	getting in
2021-10-03 17:04:51	Lontra longicaudis	D4	getting in
2021-10-03 17:04:51	Lontra longicaudis	D4	getting in
2021-10-03 17:05:06	Lontra longicaudis	D4	getting out
2021-10-03 17:05:06	Lontra longicaudis	D4	getting out
2021-10-03 17:05:07	Lontra longicaudis	D4	getting out
2021-10-05 14:58:19	Lontra longicaudis	D4	getting in
2021-10-05 14:58:19	Lontra longicaudis	D4	getting in
2021-10-05 14:58:19	Lontra longicaudis	D4	getting in
2021-10-18 13:50:25	Pteronura brasiliensis	D4	getting in
2021-10-18 13:50:25	Pteronura brasiliensis	D4	getting in
2021-10-18 13:50:25	Pteronura brasiliensis	D4	getting in
2021-10-18 13:50:39	Pteronura brasiliensis	D4	getting in
2021-10-18 13:50:39	Pteronura brasiliensis	D4	getting in
2021-10-18 13:50:39	Pteronura brasiliensis	D4	getting in
2021-10-18 13:50:53	Pteronura brasiliensis	D4	getting out
2021-10-19 06:52:15	Lontra longicaudis	D4	getting in
2021-10-19 06:52:16	Lontra longicaudis	D4	getting in
2021-10-19 06:52:16	Lontra longicaudis	D4	getting in
2021-10-20 12:26:19	Pteronura brasiliensis	D4	getting in
2021-10-20 12:26:34	Pteronura brasiliensis	D4	getting out
2021-10-20 12:26:35	Pteronura brasiliensis	D4	getting out
2021-10-20 12:26:35	Pteronura brasiliensis	D4	getting out
2021-10-20 12:26:45	Pteronura brasiliensis	D4	getting out
2021-10-20 12:26:45	Pteronura brasiliensis	D4	getting out
2021-10-20 12:26:46	Pteronura brasiliensis	D4	getting out
2021-10-21 14:34:54	Lontra longicaudis	D4	getting out
2021-10-21 14:34:54	Lontra longicaudis	D4	getting out
2021-10-21 14:34:54	Lontra longicaudis	D4	getting out
2021-10-23 13:10:54	Pteronura brasiliensis	D4	getting in
2021-10-23 13:10:54	Pteronura brasiliensis	D4	getting in
2021-10-23 13:10:55	Pteronura brasiliensis	D4	getting in
2021-10-23 13:12:26	Pteronura brasiliensis	D4	getting out
2021-10-23 13:12:26	Pteronura brasiliensis	D4	getting out
2021-10-23 13:12:26	Pteronura brasiliensis	D4	getting out
2021-10-31 17:46:14	Pteronura brasiliensis	D4	getting in
2021-10-31 17:46:14	Pteronura brasiliensis	D4	getting in
2021-10-31 17:46:15	Pteronura brasiliensis	D4	getting in
2021-10-31 17:46:35	Pteronura brasiliensis	D4	getting out
2021-10-31 17:47:13	Pteronura brasiliensis	D4	getting in
2021-10-31 17:47:14	Pteronura brasiliensis	D4	getting in
2021-10-31 17:47:14	Pteronura brasiliensis	D4	getting in
2021-11-03 08:43:30	Lontra longicaudis	D4	getting in
2021-11-03 08:43:31	Lontra longicaudis	D4	getting in
2021-11-03 08:43:31	Lontra longicaudis	D4	getting in
2021-11-03 08:43:57	Lontra longicaudis	D4	getting out
2021-11-03 08:43:57	Lontra longicaudis	D4	getting out
2021-08-18 15:32:45	Lontra longicaudis	D5	getting out
2021-08-18 15:32:45	Lontra longicaudis	D5	getting out
2021-08-18 15:32:45	Lontra longicaudis	D5	getting out
2021-09-02 14:53:15	Lontra longicaudis	D5	getting in
2021-09-02 14:53:16	Lontra longicaudis	D5	getting in
2021-09-02 14:53:16	Lontra longicaudis	D5	getting in
2021-09-02 14:53:37	Lontra longicaudis	D5	getting out
2021-09-02 14:53:38	Lontra longicaudis	D5	getting out
2021-09-02 16:43:46	Lontra longicaudis	D5	getting in
2021-09-02 16:43:47	Lontra longicaudis	D5	getting in
2021-09-02 16:43:47	Lontra longicaudis	D5	getting in
2021-09-02 16:44:05	Lontra longicaudis	D5	getting out
2021-09-05 12:43:05	Lontra longicaudis	D5	getting in
2021-09-05 12:43:06	Lontra longicaudis	D5	getting in
2021-09-05 12:43:06	Lontra longicaudis	D5	getting in
2021-09-05 12:43:17	Lontra longicaudis	D5	getting out
2021-09-09 15:06:10	Lontra longicaudis	D5	getting in
2021-09-09 15:06:10	Lontra longicaudis	D5	getting in
2021-09-09 15:06:11	Lontra longicaudis	D5	getting in
2021-09-09 15:06:28	Lontra longicaudis	D5	getting out
2021-09-09 15:06:28	Lontra longicaudis	D5	getting out
2021-09-09 15:06:29	Lontra longicaudis	D5	getting out
2021-09-11 08:06:11	Lontra longicaudis	D5	getting in
2021-09-11 08:06:12	Lontra longicaudis	D5	getting in
2021-09-11 08:06:12	Lontra longicaudis	D5	getting in
2021-09-11 08:06:38	Lontra longicaudis	D5	getting out
2021-09-11 08:06:38	Lontra longicaudis	D5	getting out
2021-09-11 08:06:39	Lontra longicaudis	D5	getting out
2021-09-11 12:17:37	Lontra longicaudis	D5	getting out
2021-09-13 16:12:52	Lontra longicaudis	D5	getting in
2021-09-13 16:12:53	Lontra longicaudis	D5	getting in
2021-09-13 16:12:53	Lontra longicaudis	D5	getting in
2021-09-13 16:13:26	Lontra longicaudis	D5	getting out
2021-09-13 16:13:27	Lontra longicaudis	D5	getting out
2021-09-13 16:13:27	Lontra longicaudis	D5	getting out
2021-09-17 08:13:07	Lontra longicaudis	D5	getting in
2021-09-17 08:13:07	Lontra longicaudis	D5	getting in
2021-09-17 08:13:07	Lontra longicaudis	D5	getting in
2021-09-17 08:13:24	Lontra longicaudis	D5	getting out
2021-09-17 08:13:25	Lontra longicaudis	D5	getting out
2021-09-21 13:52:39	Lontra longicaudis	D5	getting in
2021-09-21 13:52:39	Lontra longicaudis	D5	getting in
2021-09-21 13:52:39	Lontra longicaudis	D5	getting in
2021-09-21 13:52:56	Lontra longicaudis	D5	getting out
2021-09-22 16:53:07	Lontra longicaudis	D5	getting in
2021-09-22 16:53:07	Lontra longicaudis	D5	getting in
2021-09-22 16:53:07	Lontra longicaudis	D5	getting in
2021-09-22 16:53:26	Lontra longicaudis	D5	getting out
2021-09-22 16:53:26	Lontra longicaudis	D5	getting out
2021-09-22 16:53:27	Lontra longicaudis	D5	getting out
2021-09-26 12:26:44	Lontra longicaudis	D5	getting in
2021-09-26 12:26:45	Lontra longicaudis	D5	getting in
2021-09-26 12:26:45	Lontra longicaudis	D5	getting in
2021-09-26 12:27:07	Lontra longicaudis	D5	getting out
[truncated: 60 more rows]
